# Supplementary material for: Genome sequence of the necrotrophic fungus Penicillium digitatum, the main postharvest pathogen of citrus
Source: PubMed Central journal article supplement (PMC3532085; doi:10.1186/1471-2164-13-646), 2012-11-21
Supplement: 1471-2164-13-646-S1.pdf [file 1471-2164-13-646-S1.pdf]

## **Supplementary material for:**

### **Genome sequence of the necrotrophic fungus *Penicillium digitatum*, the main postharvest pathogen of citrus.**

Marina Marcet-Houben<sup>1†</sup>, Ana-Rosa Ballester<sup>2†</sup>, Beatriz de la Fuente<sup>2</sup>, Eleonora Harries<sup>2</sup>, Jose F. Marcos<sup>2</sup>, Luis González-Candelas<sup>2,\*</sup> and Toni Gabaldón<sup>1,\*</sup>.

- 1.- Experimental assessment of the involvement of two Pd1 specific genes in fungicide resistance.
- 2.- Supplementary figure legends
- 3.- Supplementary table legends
- 4.- References
- 5.- Supplementary figures
- 6.- Supplementary tables

## **1.- Experimental assessment of the involvement of two Pd1 specific genes in fungicide resistance.**

Isolate Pd1 contains two specific clustered genes, encoding proteins PDIP\_31800 and PDIP\_31810, that are absent in isolate PHI26. As the only known differences between these two strains are in their differential susceptibility to fungicides, we decided to generate a Pd1 mutant lacking both genes through gene disruption. Flanking regions, 5' upstream of PDIP\_31800 and 3' downstream of PDIP\_31810, were PCR-amplified and cloned into plasmid pRFHU2 (Supplementary figure 3). This plasmid was introduced into *A. tumefaciens* AGL1 cells, which were subsequently used to transform *P. digitatum* Pd1 conidia. Transformants were selected into PDA medium containing hygromycin B and monosporic isolates were obtained. Transformants were analyzed by PCR using two primers that flank both genes to detect deletion mutants. The amplicons generated in the parental strain and in a deletion mutant differ in size (Supplementary figure 4a). Out of sixty analyzed transformants we obtained three independent deletion mutants, named  $\Delta 30$ ,  $\Delta 59$  and  $\Delta 60$  (Supplementary figure 4b), which did not differ from the parental strain in growth rate and sporulation in PDA plates.

Susceptibility to six fungicides was analyzed in two of these deletion mutants ( $\Delta 30$  and  $\Delta 60$ ), an ectopic transformant (E12), the parental strain *P. digitatum* Pd1, and also *P. digitatum* PHI26 as a control. Both *P. digitatum* Pd1 and PHI26 showed the same susceptibility to azoxystrobin and trifloxystrobin. However, PHI26 was more susceptible to imazalil, myclobutanil, prochloraz and thiabendazole than Pd1 (Supplementary table 4 and Supplemental figure 5). For each fungicide Pd1 and the three mutants strains showed the same susceptibility. The highest MIC value ( $>40 \mu\text{g/mL}$ ) was observed with thiabendazole, a benzimidazole fungicide. Resistance to the two strobilurin fungicides analyzed, azoxystrobin and trifloxistobin was also high in the four strains, with a MIC value  $>10 \mu\text{g/mL}$ . Sensitivity of the strains is different to the two imidazole fungicides assayed, imazalil and prochloraz. All strains are more resistant to imazalil, MIC value of  $5 \mu\text{g/mL}$ , than to prochloraz, which is the most active among the tested fungicides. Finally, myclobutanil, a triazole fungicide, shows low activity against all the strains, with a MIC value of  $10 \mu\text{g/mL}$ .

We further analyzed whether deletion mutants were affected in their pathogenicity towards citrus fruits. Statistical analysis of two independent experiments indicate that  $\Delta 30$  and  $\Delta 60$  deletion mutants showed the same virulence towards citrus fruits as the parental Pd1 strain and the ectopic E12 transformant. The results of both the experiments are shown in Supplementary figure 6.

## **2.- Supplementary figure legends**

Supplementary figure 1.- Representation of the conserved MAT locus found in *Penicillium* and *Aspergillus* species. For each species a row of syntenic genes is shown, the colored square marked as MAT1 or MAT2 represents the mating locus, the remaining squares represent surrounding genes. U1 and U2 stand for conserved uncharacterized proteins. For *P. digitatum* the locus tags for each gene is added.

Supplementary figure 2.- Representation of the two inversions found when comparing the two newly sequenced strains of *P. digitatum*. Each square represents a gene and they are ordered as found in a given scaffold. Genes with the same coloring and number are orthologs between the two strains. The locus tag of each gene is included.

Supplementary figure 3.- Physical map of plasmid pRFD519. This plasmid is a derivative of plasmid pRFHU2 in which 5' and 3' flanking regions of *P. digitatum* Pd1 PDIP\_31800 and PDIP\_31810 genes were cloned at both sites of the hygromycin (hph) resistant marker. *P. trypC*: *Aspergillus nidulans trpC* gene promoter. *T. trpC*: *A. nidulans trpC* gene terminator. kanR: kanamycin resistant gene. TrfA: replication origin gene for *A. tumefaciens*. OriV: replication origin for *E. coli*. LB: T-DNA left border. RB: T-DNA right border.

Supplementary figure 4.- Analysis of *P. digitatum* Pd1 transformants. a) Schematic representation of the locus containing the genes PDIP\_31800 and PDIP\_31810 in the wild type (Pd1) strain and in a deletion mutant. Homologous recombination leads to the replacement of the two genes by the hygromycin resistant cassette. Location of primers used for analysis of transformants as well as the expected size of the amplicons are also indicated. b) Agarose gel electrophoresis of DNA fragments obtained by PCR amplification with primers PD519F and PD519R and DNA derived from Pd1 transformants. "E" and "Δ" transformants correspond to ectopic and deletion transformants, respectively. No template control as well as PCR amplification of the parental Pd1 strain are also included.

Supplementary figure 5.- Dose response curves of *P. digitatum* PHI26, *P. digitatum* Pd1, Pd1 deletion mutants (Δ30 and Δ60) and an Pd1 ectopic transformant (E12) to six fungicides. Fungal conidia (10<sup>5</sup> conidia/mL) were cultured in PDB in the presence of increasing concentrations of the fungicides. Samples were prepared in triplicate. Plates were incubated at 24 °C and growth, measured as A<sub>600</sub>, was followed for up to seven days. Data show the mean values ± SD at each fungicide concentration. Dose

is given as  $\mu\text{g}$  of active ingredient per mL.

Supplementary figure 6.- Pathogenicity assays of *P. digitatum* Pd1 parental strain,  $\Delta 30$  and  $\Delta 60$  deletion transformants, and E12 ectopic transformant towards citrus fruits. Navel (Experiment 1) or Lanelate (Experiment 2) oranges were wounded and inoculated with 10  $\mu\text{L}$  of spore suspensions of the different fungi. Fruits were incubated at 20 °C and 90 % relative humidity for five days. There were three replicates of five fruits. Bars show the mean values of the percentage of infected wounds and their standard deviation at three, four and five days post-inoculation (dpi). Bars labeled with the same letter do not differ at the 95% confidence level (least significant difference test). Statistical analysis was conducted independently for four and five dpi.

Supplementary figure 7.- Pie charts comparing the COG functional classes in *P. digitatum* and *P. chrysogenum*.

Supplementary figure 8.- Genomic organization of the patulin gene cluster in *P. digitatum* PHI26 and *A. clavatus*. Homologous genes are indicated with arrows of the same color. Genes homologous to black colored *A. clavatus* pat genes are found dispersed in other scaffolds in the genome of *P. digitatum* PHI26. Asterisk in patI\* indicates that this gene is a putative truncated homolog of the *A. clavatus* PatI gene. Patulin cluster of *A. clavatus* adapted from Artigot et al [1].

Supplementary figure 9.- Flow chart showing the three steps used during the gene annotation process. For each step the number of additionally annotated genes in *P. digitatum* PHI26 is shown.

### **3.- Supplementary table legends**

Supplementary table 1.- List of repetitive regions detected in *P. digitatum* and *P. chrysogenum*.

Supplementary table 2.- List of strain-specific genes in each *P. digitatum* strain. Strain specific genes are only considered as such when no reads of the opposite strain map to it.

Supplementary table 3.- List of genes that contain more than one non-synonymous mutation when comparing the two *P. digitatum* strains. First and second column represent the codes of the orthologous

gene (NO BRH means no best reciprocal hit was found in the PHI26 strain). Third and fourth column show the synonymous and non-synonymous mutations respectively and the last column shows the annotation of the genes.

Supplementary table 4.- Minimum inhibitory concentration (MIC) values of different fungicides against *P. digitatum* PHI26, *P. digitatum* Pd1, Pd1 deletion transformants  $\Delta$ 30 and  $\Delta$ 60 and Pd1 ectopic transformant E12. Values are expressed in  $\mu$ g/mL.

Supplementary table 5.- List of proteomes used during phylome reconstruction and at different stages of this analysis. The first column shows the NCBI taxonomy ID, second column contains the species name, third column is the source of the proteome and the last column shows the number of proteins in each species.

Supplementary table 6.- List of over-represented Pfam domains found in the scaffolds of *P. chrysogenum* that do not have homologs in *P. digitatum* PHI26.

Supplementary table 7.- List of *P. digitatum* proteins that only contain homologs in the other plant-pathogenic species included in the phylome. Columns represent gene name in *P. digitatum* PHI26, its ortholog in *P. digitatum* Pd1 and the annotation.

Supplementary table 8.- List of candidate proteins that may have resulted from a horizontal gene transfer from prokaryotes. Columns represent gene name in *P. digitatum* PHI26, its ortholog in *P. digitatum* Pd1 and the annotation.

Supplementary table 9.- List of secondary metabolism backbone genes as predicted by SMURF [2]

Supplementary table 10.- dN / dS analysis of patulin orthologs between *Aspergillus clavatus* and *P. digitatum* PHI26.

Supplementary table 11.- List of putative small cysteine- rich proteins (CRPs) predicted in *P. digitatum* PHI26. Columns represent assigned name, scaffold, position and protein sequence.

Supplementary table 12.- List of proteins that either contain a LysM domain or have been detected as

orthologs to a LysM protein in another species used in the phylome. Columns represent gene name in *P. digitatum* PHI26, its ortholog in *P. digitatum* Pd1 and the annotation.

Supplementary table 13.- Summary of CAZy enzymes found in four fungal species including the two *P. digitatum* strains.

Supplementary table 14.- List of secreted proteins predicted in the two *P. digitatum* strains. Columns represent gene name in *P. digitatum* PHI26, its ortholog in *P. digitatum* Pd1 and the annotation.

#### **4.- References:**

1. Artigot MP, Loiseau N, Laffitte J, Mas-Reguieg L, Tadrict S, Oswald IP, Puel O: **Molecular cloning and functional characterization of two CYP619 cytochrome P450s involved in biosynthesis of patulin in *Aspergillus clavatus*.** *Microbiology* 2009, **155(Pt 5)**:1738-1747.
2. Khaldi N, Seifuddin FT, Turner G, Haft D, Nierman WC, Wolfe KH, Fedorova ND: **SMURF: Genomic mapping of fungal secondary metabolite clusters.** *Fungal genetics and biology : FG & B* 2010, **47**:736-41.

## **5.- Supplementary figures**

# Supplementary figure 1

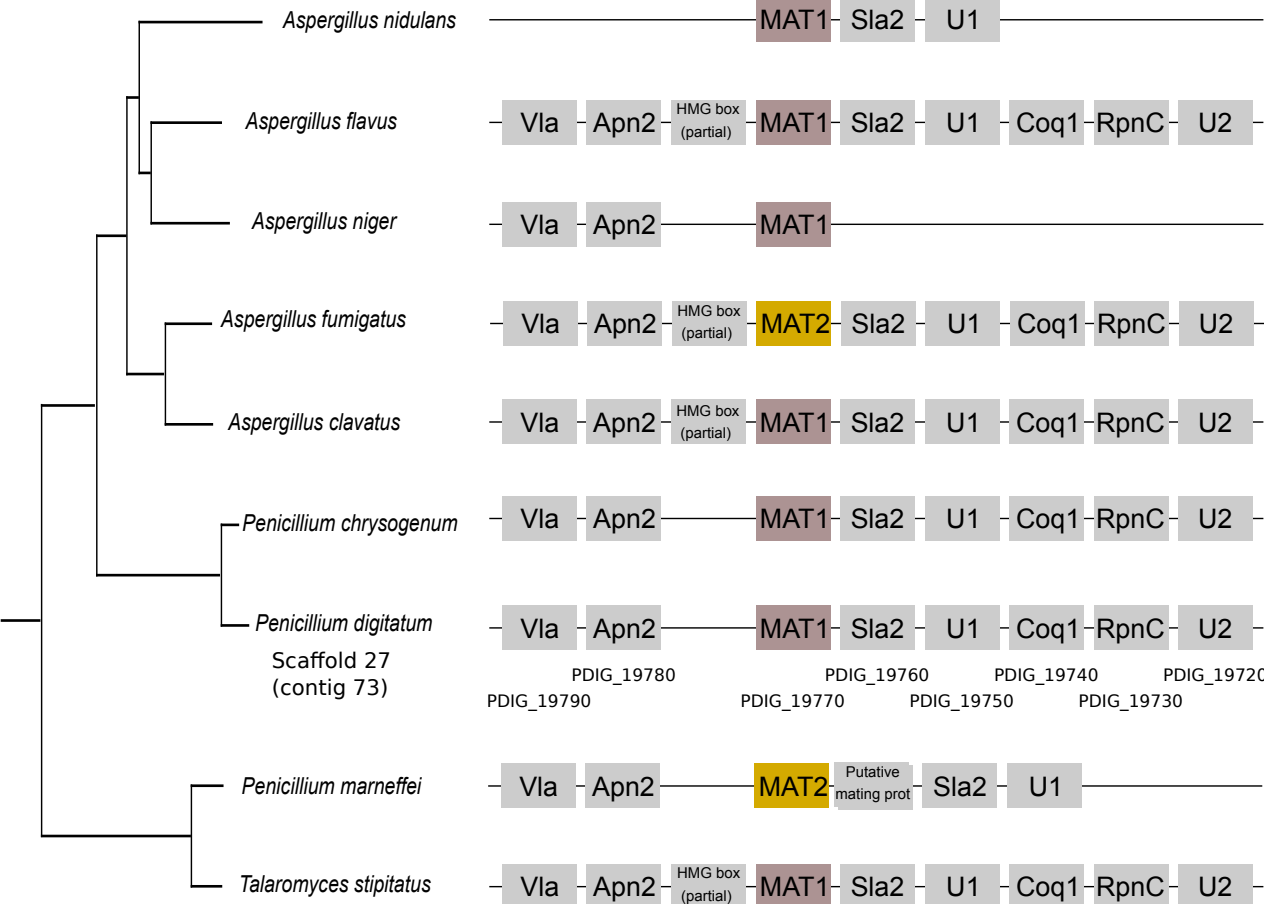



# Supplementary figure 2

## Inversion 1

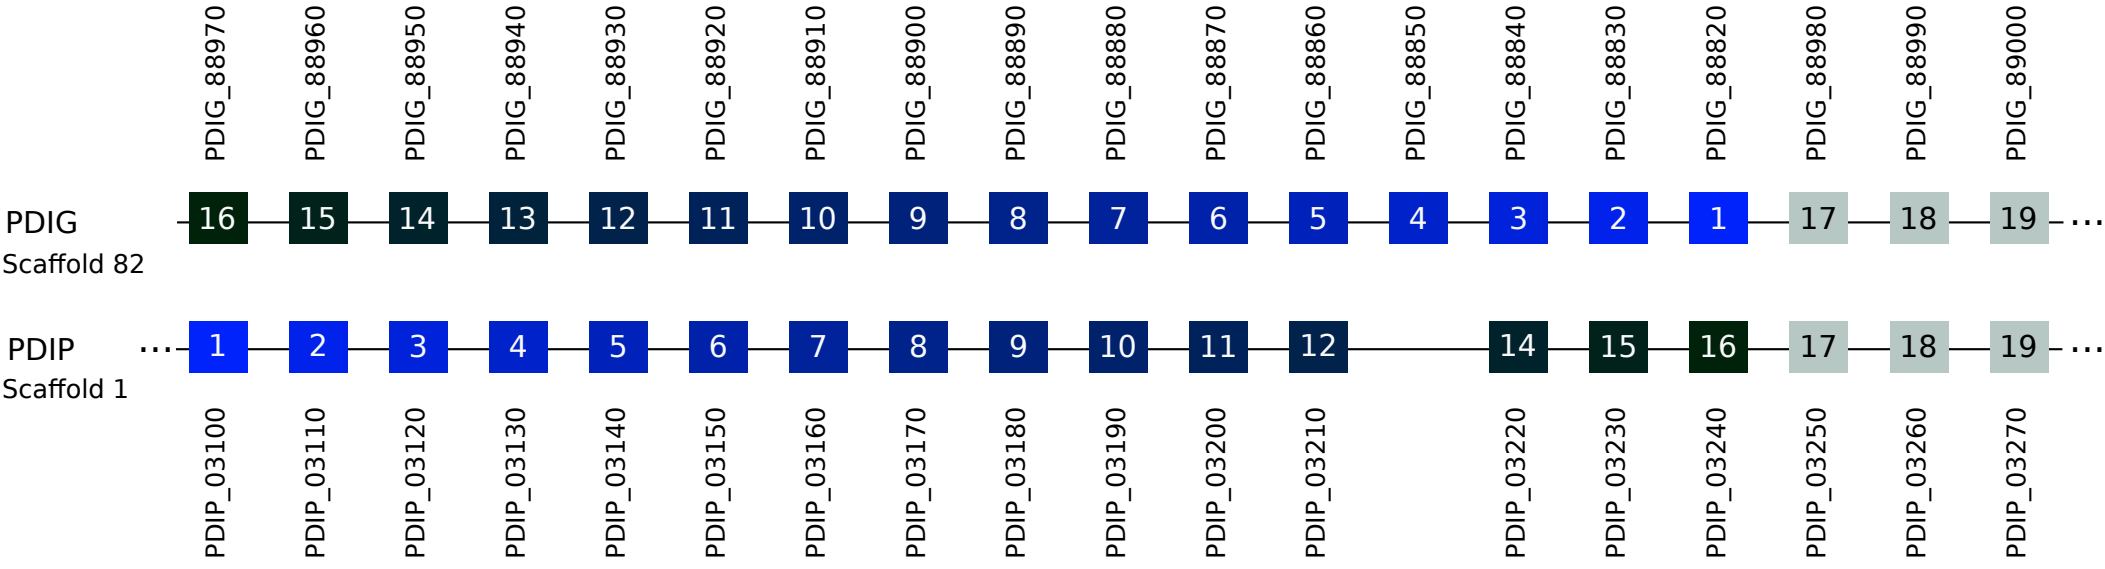

## Inversion 2

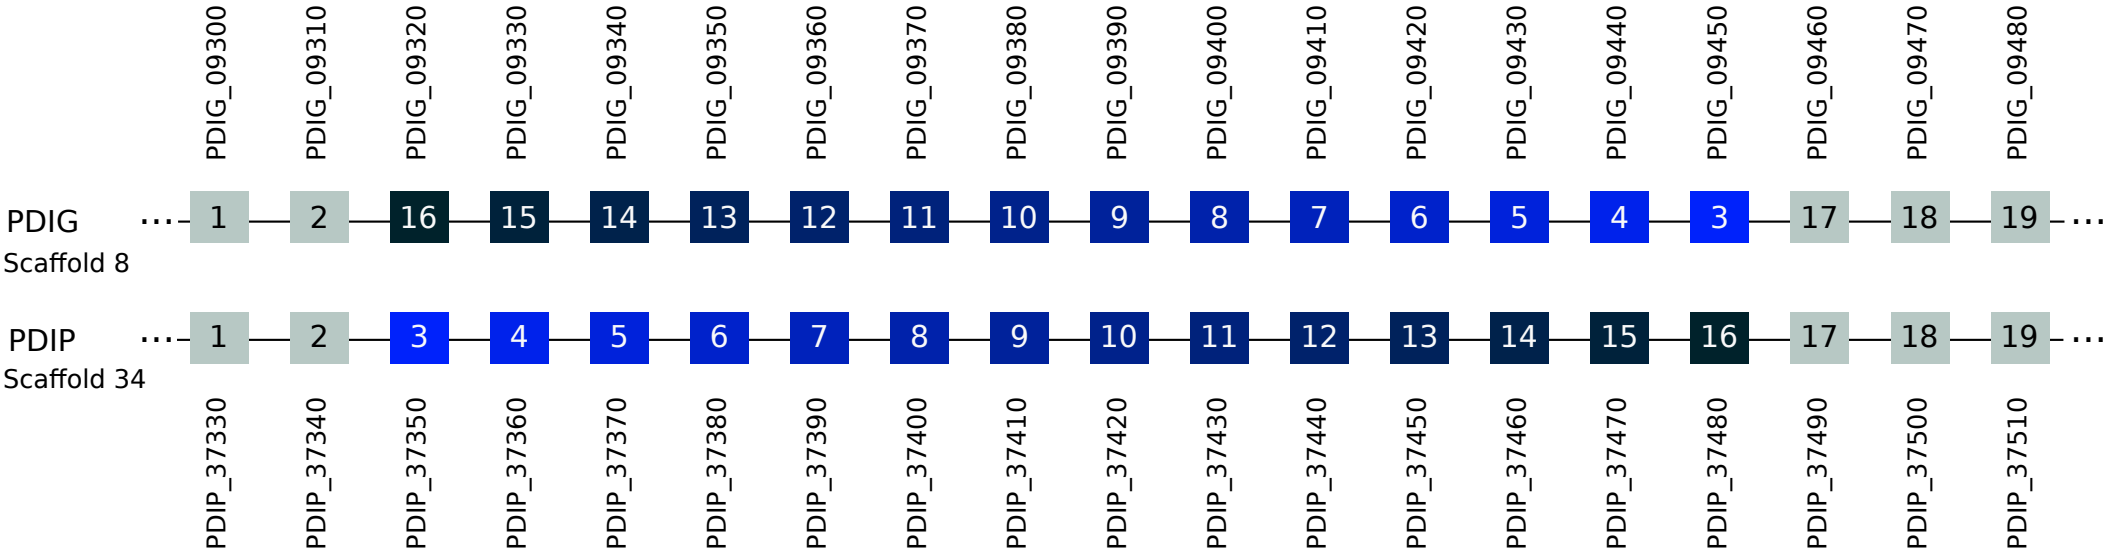

# Supplementary figure 3

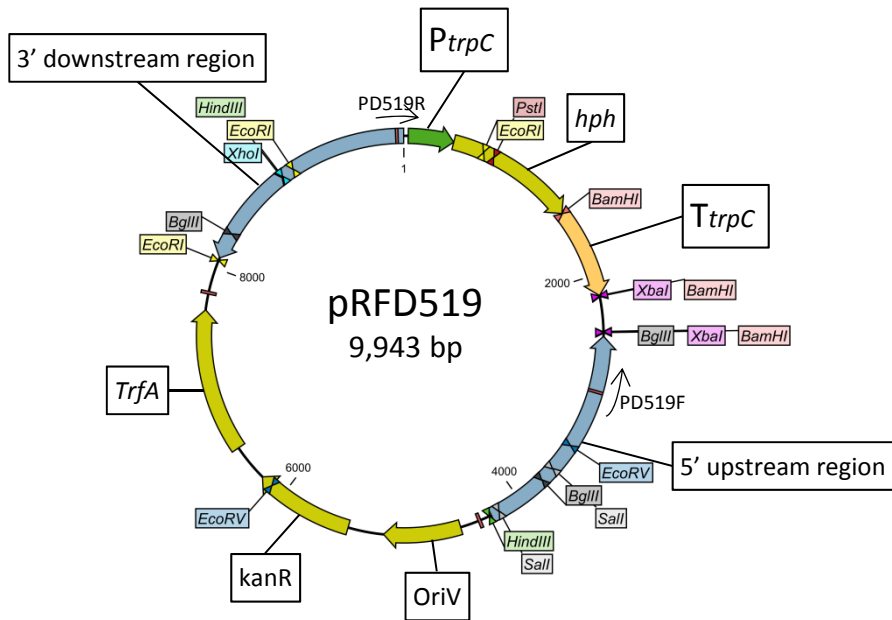

# Supplementary figure 4

a

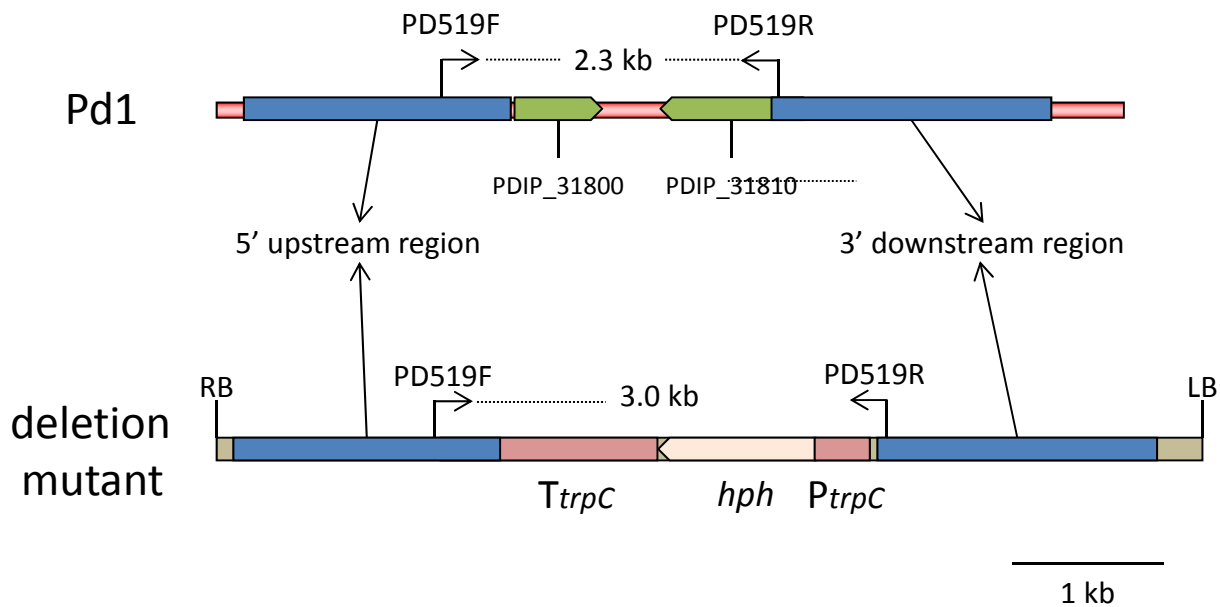

b

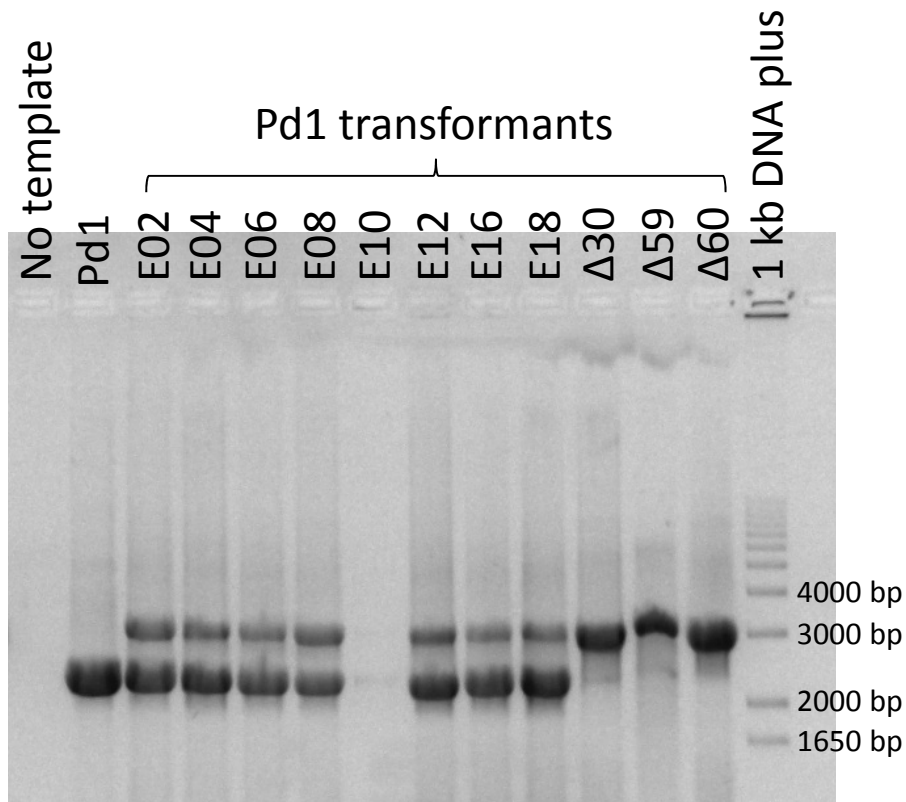

# Supplementary figure 5

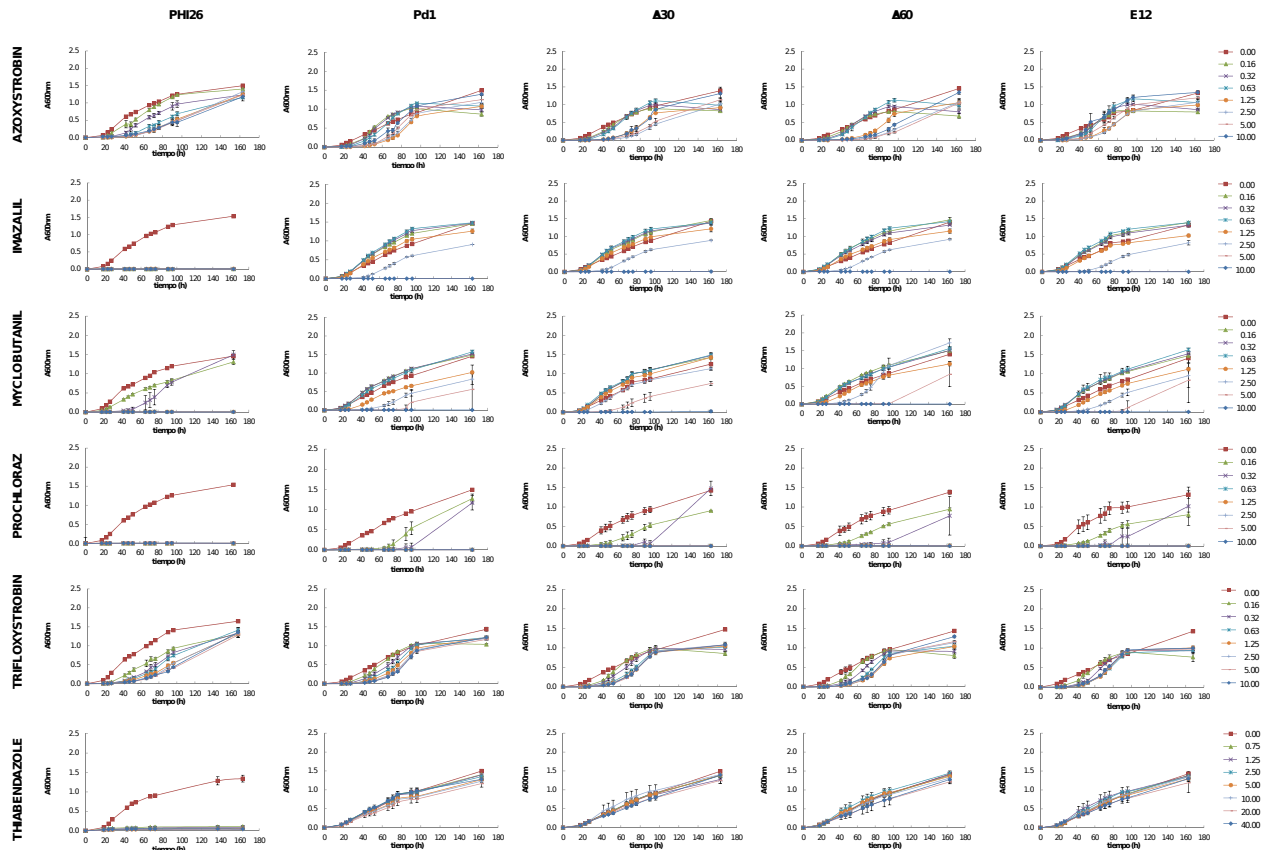

## Supplementary figure 6

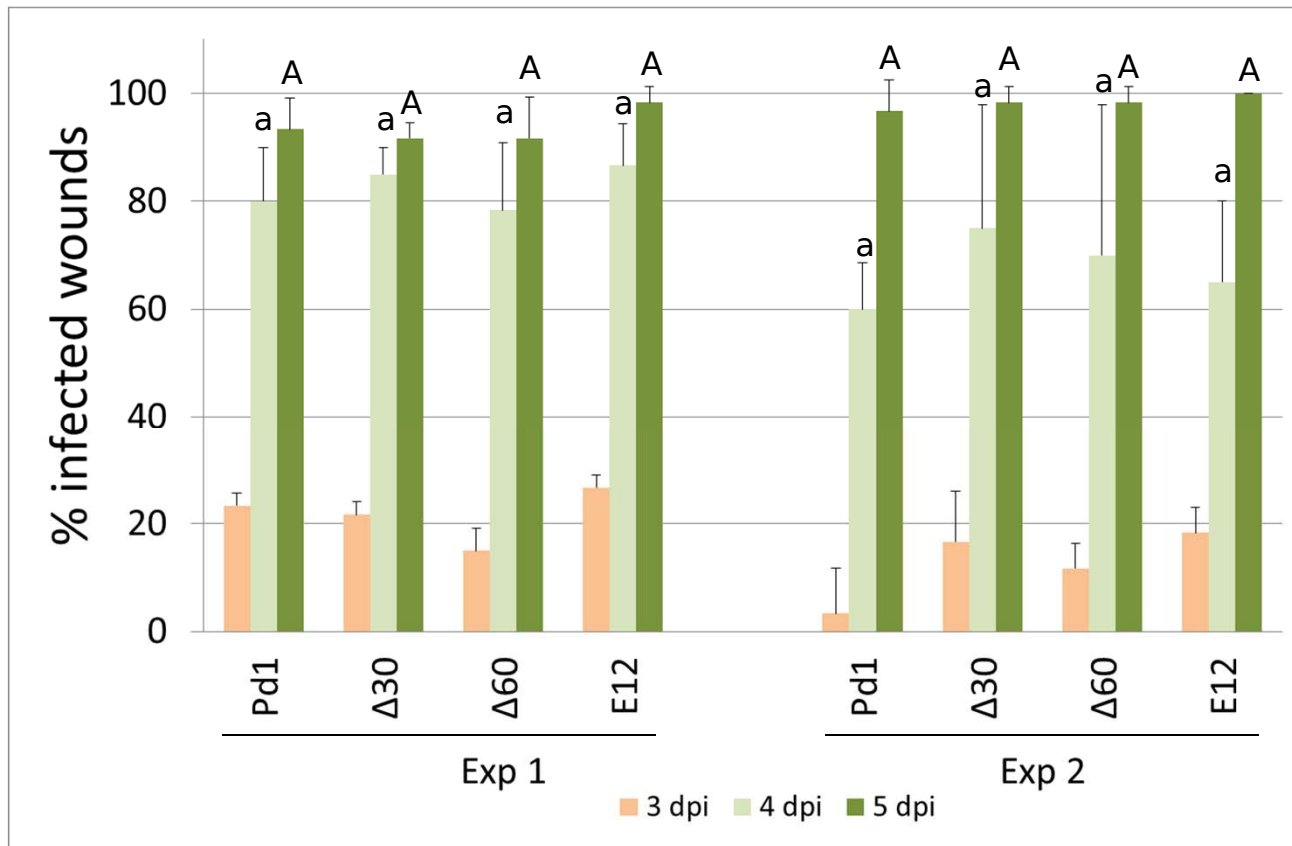

# Supplementary figure 7

## Penicillium digitatum

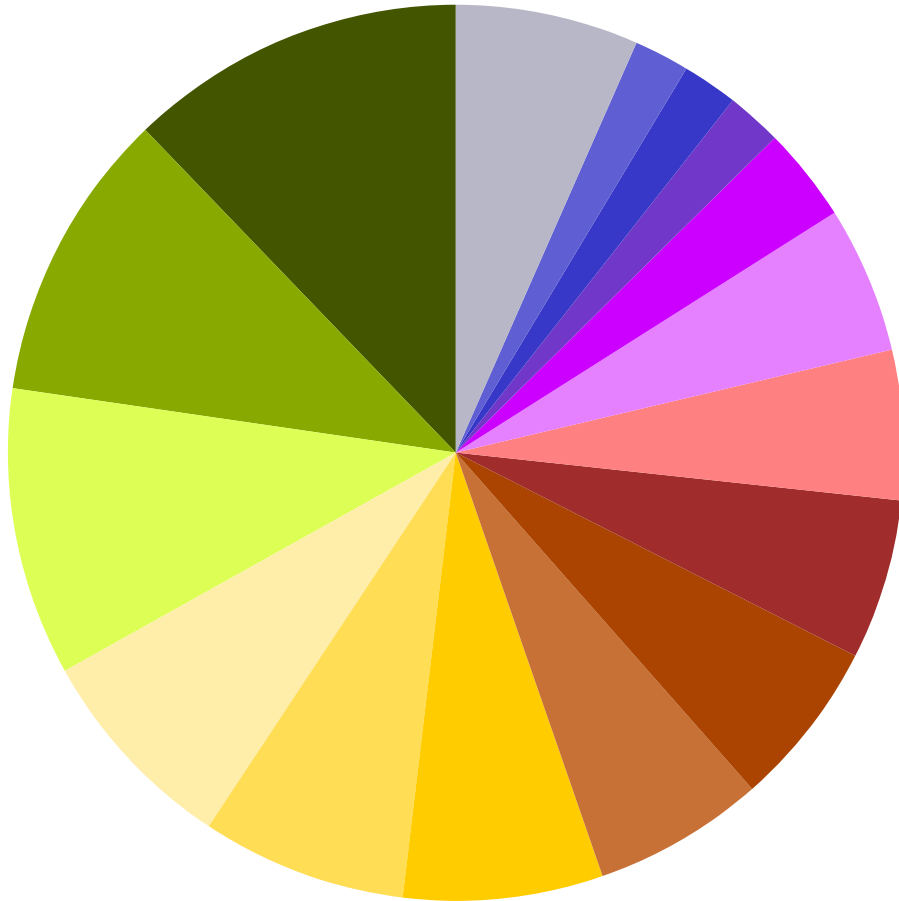

## Penicillium chrysogenum

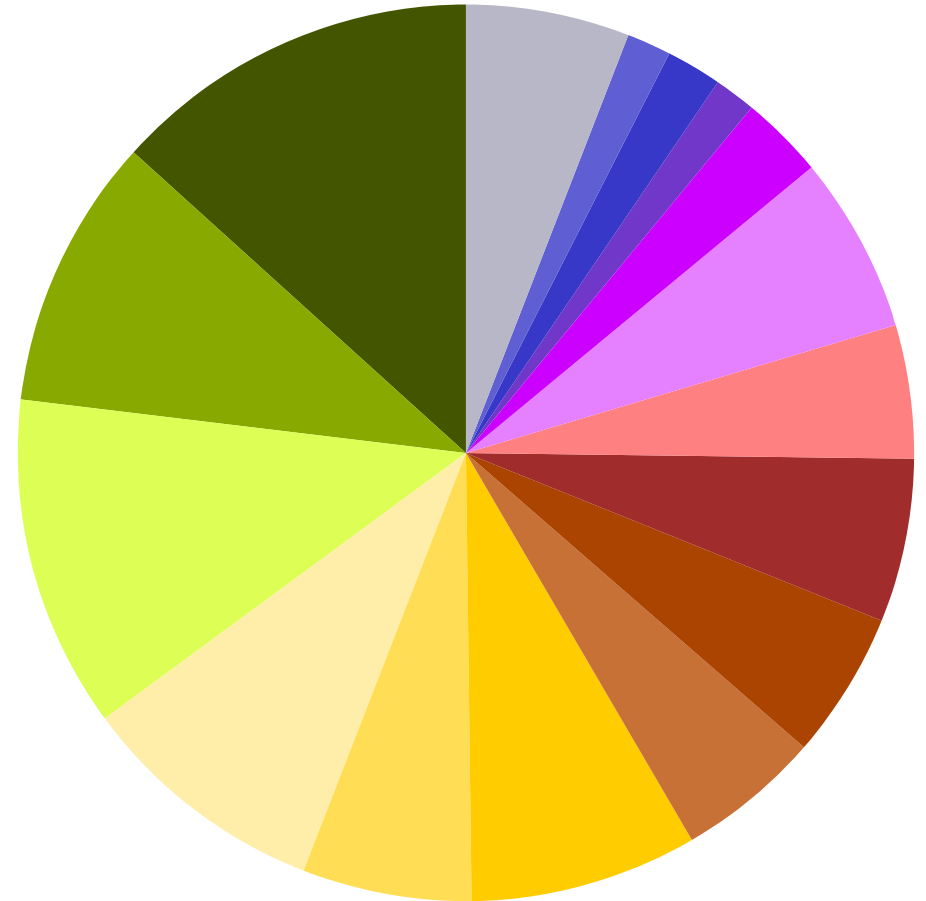

 Amino acid transport and metabolism

 Transcription

 Carbohydrate transport and metabolism

 Inorganic ion transport and metabolism

 Replication, recombination and repair

 Secondary metabolites biosynthesis, transport and catabolism

 Posttranslational modification, protein turnover, chaperones

 Translation, ribosomal structure and biogenesis

 Energy production and conversion

 Signal transduction mechanisms

 Lipid transport and metabolism

 Coenzyme transport and metabolism

 Cell cycle control, cell division, chromosome partitioning

 Nucleotide transport and metabolism

 Intracellular trafficking, secretion, and vesicular transport

 Others

## Supplementary figure 8

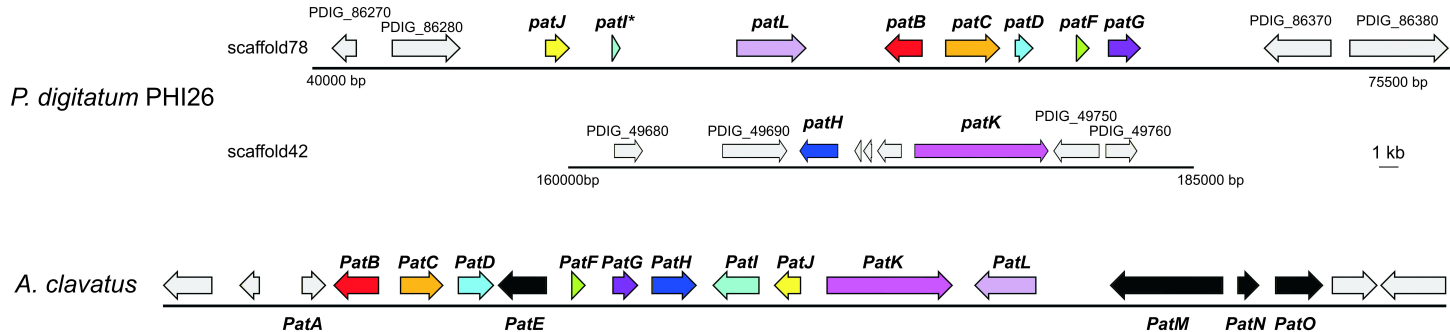

# Gene annotation pipeline

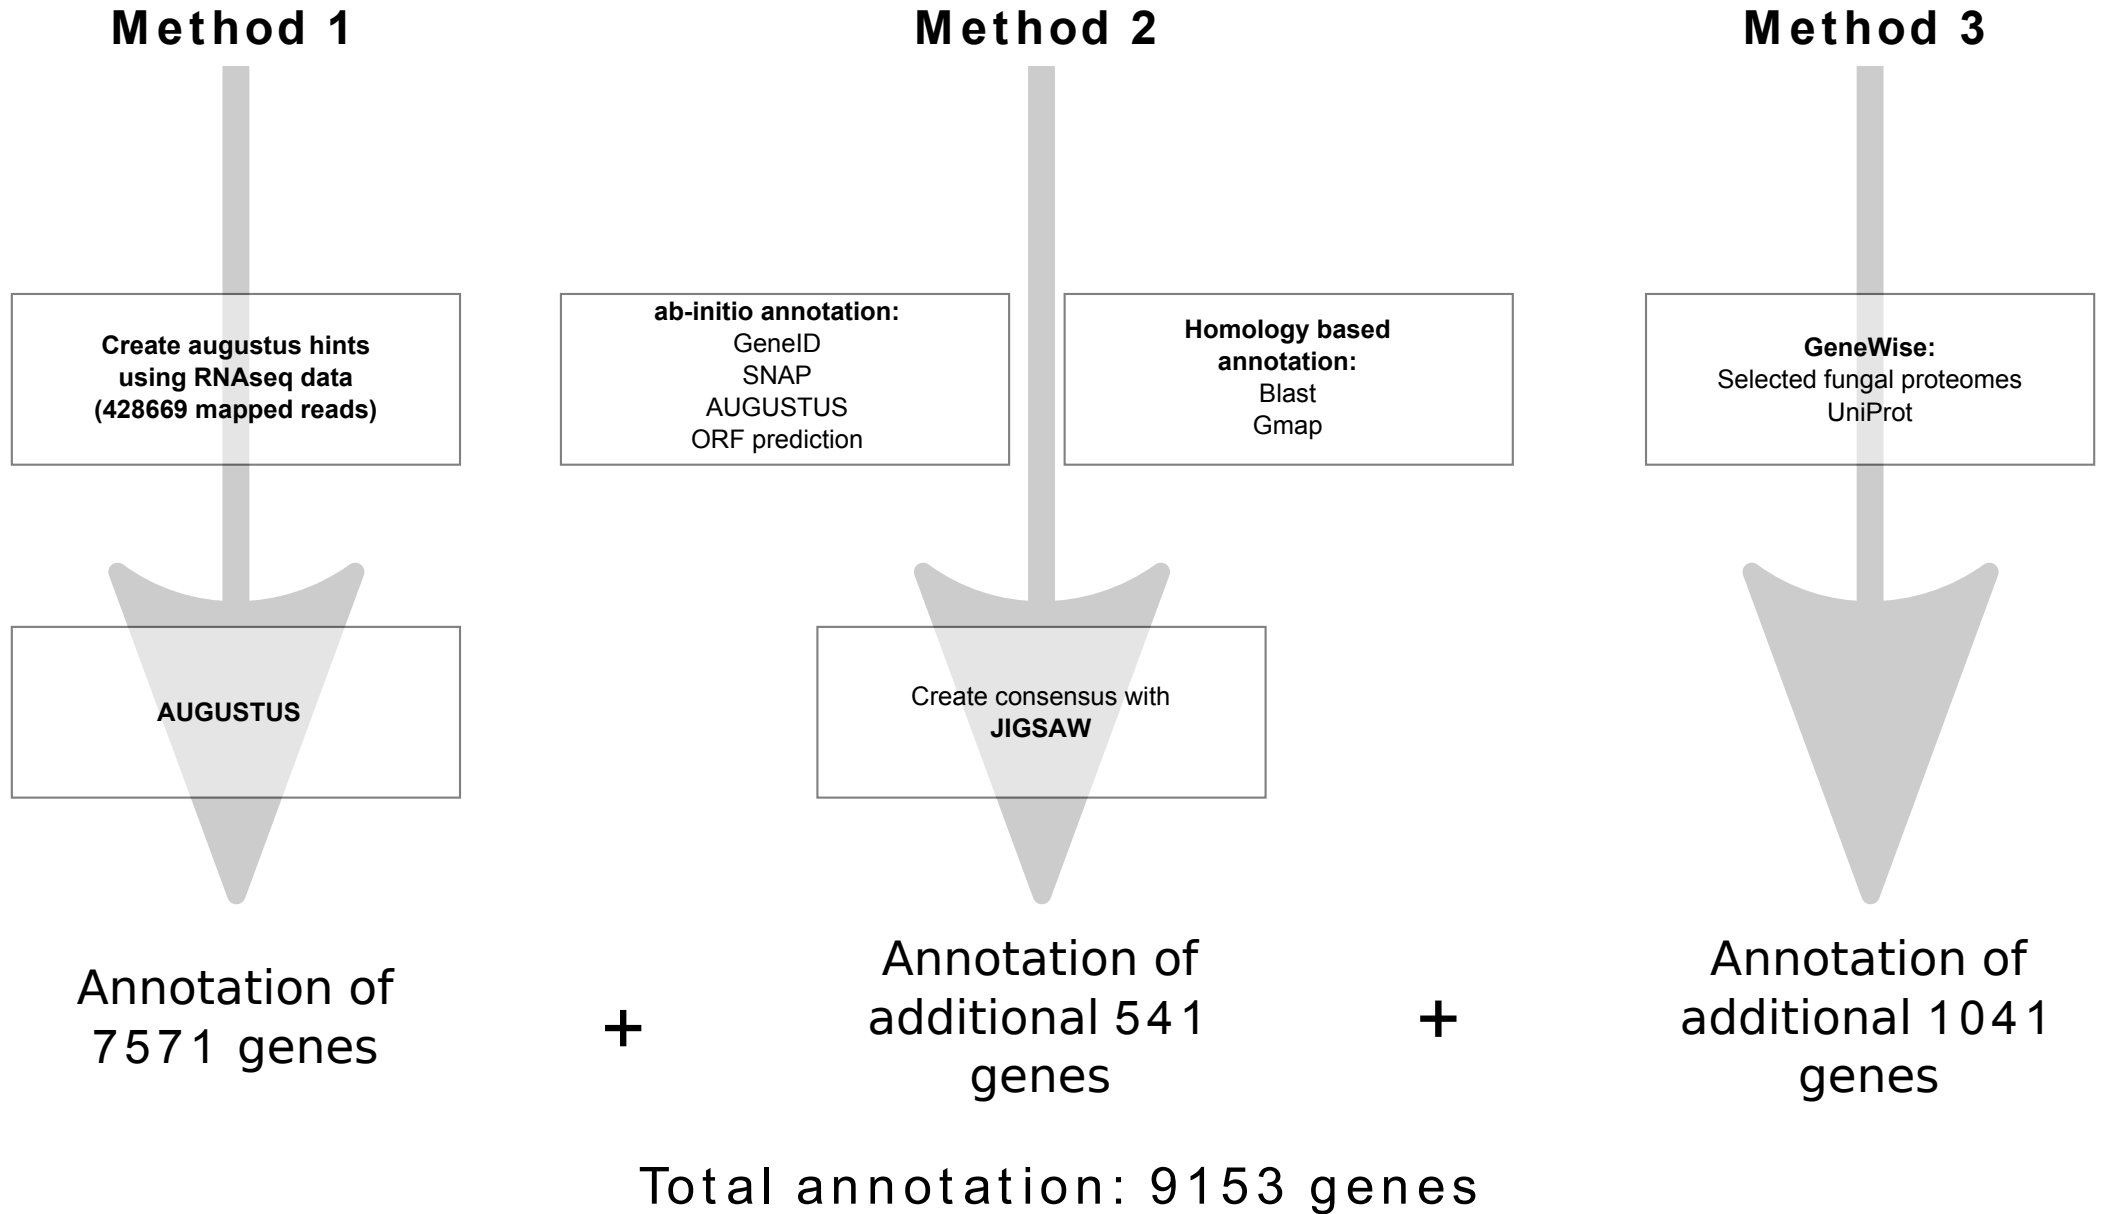



## **6.- Supplementary Tables**

|                 |                                    | <b>Supplementary table 1: List of repetitive elements</b> |             |                      |                              |             |                      |        |
|-----------------|------------------------------------|-----------------------------------------------------------|-------------|----------------------|------------------------------|-------------|----------------------|--------|
|                 |                                    | <b><i>P. digitatum</i> PHI26</b>                          |             |                      | <b><i>P. chrysogenum</i></b> |             |                      |        |
|                 |                                    | Number of elements                                        | bp included | Percentage in genome | Number of elements           | bp included | Percentage in genome |        |
| Retroelements   | SINEs                              | 6                                                         | 971 bp      | 0.00 %               | 11                           | 1385 bp     | 0.00 %               |        |
|                 | Penelope                           | 4                                                         | 444 bp      | 0.00 %               | 0                            | 0 bp        | 0.00 %               |        |
|                 | LINEs                              | LINEs                                                     | 106         | 42303 bp             | 0.16 %                       | 92          | 97053 bp             | 0.08 % |
|                 |                                    | CRE/SLACS                                                 | 0           | 0 bp                 | 0.00 %                       | 0           | 0 bp                 | 0.00 % |
|                 |                                    | L2/CR1/Rex                                                | 0           | 0 bp                 | 0.00 %                       | 0           | 0 bp                 | 0.00 % |
|                 |                                    | R1/LOA/Jockey                                             | 0           | 0 bp                 | 0.00 %                       | 0           | 0 bp                 | 0.00 % |
|                 |                                    | R2/R4/NeSL                                                | 0           | 0 bp                 | 0.00 %                       | 0           | 0 bp                 | 0.00 % |
|                 |                                    | RTE/Bov-B                                                 | 0           | 0 bp                 | 0.00 %                       | 0           | 0 bp                 | 0.00 % |
|                 |                                    | L1/CIN4                                                   | 0           | 0 bp                 | 0.00 %                       | 0           | 0 bp                 | 0.00 % |
|                 | LTR elements                       | BEL/Pao                                                   | 0           | 0 bp                 | 0.00 %                       | 0           | 0 bp                 | 0.00 % |
|                 |                                    | Ty1/Copia                                                 | 38          | 14521 bp             | 0.06 %                       | 84          | 36114 bp             | 0.11 % |
|                 |                                    | Gypsy/DIRS1                                               | 103         | 51283 bp             | 0.20 %                       | 88          | 53012 bp             | 0.16 % |
|                 |                                    | TOTAL                                                     | 253         | 109078 bp            | 0.42 %                       | 172         | 89126 bp             | 0.28 % |
| Dna transposons | hobo-Activator                     | 61                                                        | 18518 bp    | 0.07 %               | 25                           | 9044 bp     | 0.03 %               |        |
|                 | Tc1-IS630-Pogo                     | 245                                                       | 102945 bp   | 0.40 %               | 168                          | 103781 bp   | 0.32 %               |        |
|                 | En-Spm                             | 0                                                         | 0 bp        | 0.00 %               | 0                            | 0 bp        | 0.00 %               |        |
|                 | MuDR-IS905                         | 1                                                         | 57 bp       | 0.00 %               | 1                            | 113 bp      | 0.00 %               |        |
|                 | PiggyBac                           | 0                                                         | 0 bp        | 0.00 %               | 0                            | 0 bp        | 0.00 %               |        |
|                 | Tourist/Harbinger                  | 0                                                         | 0 bp        | 0.00 %               | 0                            | 0 bp        | 0.00 %               |        |
|                 | Other (Mirage, P-element, Transib) | 0                                                         | 0 bp        | 0.00 %               | 0                            | 0 bp        | 0.00 %               |        |
|                 | TOTAL                              | 313                                                       | 126891 bp   | 0.49 %               | 199                          | 118182 bp   | 0.37 %               |        |
| Unclassified:   | 2                                  | 242 bp                                                    | 0.00 %      | 3                    | 309 bp                       | 0.00 %      |                      |        |
| Small RNA:      | 56                                 | 6278 bp                                                   | 0.02 %      | 68                   | 10676 bp                     | 0.03 %      |                      |        |
| Satellites:     | 2                                  | 178 bp                                                    | 0.00 %      | 1                    | 114 bp                       | 0.00 %      |                      |        |
| Simple repeats: | 1092                               | 74290 bp                                                  | 0.29 %      | 1270                 | 66536 bp                     | 0.21 %      |                      |        |
| Low complexity: | 877                                | 44560 bp                                                  | 0.17 %      | 1483                 | 81628 bp                     | 0.25 %      |                      |        |

**Supplementary table 2: Comparison of the protein content between the two *Penicillium digitatum* strains**

| <b>Proteins missing in <i>P. digitatum</i> Pd1</b> |                                                    | <b>Proteins missing in <i>P. digitatum</i> PHI26</b> |                                          |
|----------------------------------------------------|----------------------------------------------------|------------------------------------------------------|------------------------------------------|
| PDIG_03320                                         | Putative protein with kinase activity              | PDIP_31800                                           | Phosphotransferase enzyme family protein |
| PDIG_03340                                         | Putative protein                                   | PDIP_31810                                           | Uncharacterized protein                  |
| PDIG_03350                                         | Putative protein                                   |                                                      |                                          |
| PDIG_03360                                         | Putative protein contains DUF2841 domain           |                                                      |                                          |
| PDIG_76440                                         | Metalloreductase transmembrane component, putative |                                                      |                                          |
| PDIG_17070                                         | Putative protein                                   |                                                      |                                          |
| PDIG_81290                                         | Putative protein, low-complexity protein           |                                                      |                                          |
| PDIG_81500                                         | Putative protein, low-complexity protein           |                                                      |                                          |

**Supplementary table 3: List of genes containing more than one non-synonymous substitution**

| <i>P. digitatum</i> Pd1 | <i>P. digitatum</i> PHI26 | Synonym mutations | Non-synonymous mutations | Annotation                                                                                                    |
|-------------------------|---------------------------|-------------------|--------------------------|---------------------------------------------------------------------------------------------------------------|
| PDIP_19890              | PDIG_50650                | 0                 | 2                        | Putative uncharacterized protein [Ortholog: <i>Aspergillus fumigatus</i> : Q4WJQ7]                            |
| PDIP_16880              | PDIG_44900                | 0                 | 2                        | MFS transporter, putative [Ortholog: <i>Talaromyces stipitatus</i> : B8M635]                                  |
| PDIP_34330              | PDIG_18910                | 21                | 13                       | Putative uncharacterized protein [Ortholog: <i>Emericella nidulans</i> : Q5AST2]                              |
| PDIP_87550              | PDIG_79170                | 4                 | 12                       | Putative uncharacterized protein [Ortholog: <i>Talaromyces stipitatus</i> : B8LX17]                           |
| PDIP_27600              | NO BRH                    | 0                 | 3                        | Putative protein                                                                                              |
| PDIP_29400              | PDIG_33240                | 2                 | 2                        | Similarity to reverse transcriptase pol - <i>Volvox carteri</i> [Ortholog: <i>Aspergillus niger</i> : A2QJ59] |
| PDIP_30470              | PDIG_14950                | 0                 | 2                        | Elongation factor 1-beta [Ortholog: <i>Uncinocarpus reesii</i> : C4JTV2]                                      |
| PDIP_27160              | PDIG_78750                | 0                 | 2                        | Equisetin synthetase, putative [Ortholog: <i>Aspergillus clavatus</i> : A1CPQ3]                               |
| PDIP_36000              | PDIG_07960                | 0                 | 2                        | Ubiquitin-protein ligase Ufd4, putative [Ortholog: <i>Aspergillus fumigatus</i> : Q4WMS5]                     |
| PDIP_36620              | PDIG_08600                | 0                 | 2                        | Putative uncharacterized protein [Ortholog: <i>Emericella nidulans</i> : Q5BC08]                              |
| PDIP_41980              | NO BRH                    | 6                 | 6                        | Putative protein                                                                                              |
| PDIP_52580              | PDIG_33020                | 5                 | 2                        | Nuclear migration protein (ApsA), putative [Ortholog: <i>Aspergillus fumigatus</i> : Q4WU99]                  |
| PDIP_47650              | PDIG_13650                | 0                 | 2                        | MATH and UCH domain protein, putative [Ortholog: <i>Aspergillus fumigatus</i> : Q4WE48]                       |
| PDIP_52700              | NO BRH                    | 4                 | 3                        | Putative protein                                                                                              |
| PDIP_61970              | PDIG_27530                | 0                 | 2                        | Serine/threonine protein kinase (Kcc4), putative [Ortholog: <i>Aspergillus fumigatus</i> : Q4WCS9]            |
| PDIP_62320              | PDIG_27880                | 0                 | 2                        | Rad21/Rec8 N terminal domain protein [Ortholog: <i>Aspergillus fumigatus</i> : Q4WCZ0]                        |
| PDIP_80270              | PDIG_70950                | 0                 | 2                        | Integral membrane protein [Ortholog: <i>Aspergillus fumigatus</i> : Q4WZ73]                                   |
| PDIP_81390              | PDIG_72120                | 0                 | 2                        | Similar to Pc21g02960 protein (Uncharacterized protein)                                                       |
| PDIP_82570              | PDIG_11060                | 0                 | 2                        | Topoisomerase family protein TRF4, putative [Ortholog: <i>Aspergillus fumigatus</i> : Q4WG84]                 |
| PDIP_71770              | PDIG_62390                | 0                 | 2                        | Predicted protein [Ortholog: <i>Uncinocarpus reesii</i> : C4JER5]                                             |
| PDIP_06070              | PDIG_41990                | 0                 | 2                        | ABC multidrug transporter, putative [Ortholog: <i>Aspergillus fumigatus</i> : Q4WT65]                         |
| PDIP_33880              | PDIG_87860                | 0                 | 2                        | Proteasome activator subunit 4, putative [Ortholog: <i>Aspergillus fumigatus</i> : Q4WQ22]                    |

NO BRH: No best reciprocal hit was found in the PHI26 strain

**Supplementary table 4: Minimum inhibitory concentration values ( $\mu\text{g/mL}$ )**

| <b>Fungicide name</b> | <b>PHI26</b> | <b>Pd1</b> | <b><math>\Delta 30</math></b> | <b><math>\Delta 60</math></b> | <b>E12</b> |
|-----------------------|--------------|------------|-------------------------------|-------------------------------|------------|
| Azoxystrobin          | >10          | >10        | >10                           | >10                           | >10        |
| Imazalil              | <0.16        | 5          | 5                             | 5                             | 5          |
| Myclobutanil          | 0.63         | 10         | 10                            | 10                            | 10         |
| Prochloraz            | <0.16        | 0.63       | 0.63                          | 0.63                          | 0.63       |
| Trifloxystrobin       | >10          | >10        | >10                           | >10                           | >10        |
| Thiabendazole         | <0.63        | >40        | >40                           | >40                           | >40        |

**Supplementary table 5: List of proteomes used in the phylome**

| <b>Taxonomy ID</b> | <b>Species name</b>                     | <b>Source</b>             | <b>Proteome size</b> |
|--------------------|-----------------------------------------|---------------------------|----------------------|
| 5037               | <i>Ajellomyces capsulata</i>            | Broad Institute           | 9271                 |
| 602072             | <i>Aspergillus carbonarius</i>          | JGI                       | 11184                |
| 5057               | <i>Aspergillus clavatus</i>             | UniProt reference genomes | 9120                 |
| 5059               | <i>Aspergillus flavus</i>               | UniProt reference genomes | 13486                |
| 5085               | <i>Aspergillus fumigatus</i>            | UniProt reference genomes | 9630                 |
| 5061               | <i>Aspergillus niger</i>                | UniProt reference genomes | 13905                |
| 40559              | <i>Botrytis fuckeliana</i>              | Broad institute           | 16400                |
| 5501               | <i>Coccidioides immitis</i>             | Broad institute           | 9750                 |
| 5016               | <i>Cochliobolus heterostrophus</i>      | JGI                       | 9623                 |
| 5116               | <i>Cryphonectria parasitica</i>         | JGI                       | 11145                |
| 162425             | <i>Emericella nidulans</i>              | UniProt reference genomes | 9417                 |
| 5507               | <i>Fusarium oxysporum</i>               | Broad institute           | 16646                |
| 36779              | <i>Gaeumannomyces graminis</i>          | Broad institute           | 14456                |
| 5518               | <i>Gibberella zeae</i>                  | BroadInstitute            | 13318                |
| 645133             | <i>Glomerella graminicola</i>           | Broad institute           | 12005                |
| 148305             | <i>Magnaporthe grisea</i>               | UniProt reference genomes | 12686                |
| 242507             | <i>Magnaporthe oryzae 70-15</i>         | Broad institute           | 12681                |
| 54734              | <i>Mycosphaerella graminicola</i>       | JGI                       | 10938                |
| 140110             | <i>Nectria haematococca</i>             | JGI                       | 15678                |
| 5141               | <i>Neurospora crassa</i>                | UniProt reference genomes | 9826                 |
| 5076               | <i>Penicillium chrysogenum</i>          | Hyphal tip                | 12768                |
| 36651              | <i>Penicillium digitatum PHI26</i>      | Sequenced CRG             | 9158                 |
| 441960             | <i>Penicillium marneffei ATCC 18224</i> | Hyphal tip                | 10001                |
| 13684              | <i>Phaeosphaeria nodorum</i>            | Broad institute           | 12374                |
| 426418             | <i>Pyrenophora tritici-repentis</i>     | Broad Institute           | 12062                |
| 5180               | <i>Sclerotinia sclerotiorum</i>         | Broad institute           | 14457                |
| 441959             | <i>Talaromyces stipitatus</i>           | NCBI                      | 12996                |
| 336963             | <i>Uncinocarpus reesii</i>              | Broad Institute           | 7771                 |
| 526221             | <i>Verticillium albo-atrum</i>          | Broad Institute           | 10218                |

**Supplementary table 6: Pfam domains found in missing scaffolds of *P. chrysogenum***

| <b>Pfam domain</b> | <b>Pfam domain description</b>           | <b>Times found in a missing scaffold</b> | <b>Times found in whole genome</b> | <b>%</b> |
|--------------------|------------------------------------------|------------------------------------------|------------------------------------|----------|
| PF05699.8          | hAT family dimerisation domain           | 10                                       | 13                                 | 0.77     |
| PF02892.9          | BED zinc finger                          | 2                                        | 3                                  | 0.67     |
| PF00665.20         | Integrase core domain                    | 5                                        | 8                                  | 0.63     |
| PF07727.8          | Reverse transcriptase                    | 5                                        | 9                                  | 0.56     |
| PF04516.9          | CP2 transcription factor                 | 2                                        | 4                                  | 0.50     |
| PF11034.2          | Protein of unknown function (DUF2823)    | 2                                        | 4                                  | 0.50     |
| PF11402.2          | Antifungal protein                       | 1                                        | 2                                  | 0.50     |
| PF11327.2          | Protein of unknown function (DUF3129)    | 1                                        | 2                                  | 0.50     |
| PF11702.2          | Protein of unknown function (DUF3295)    | 1                                        | 2                                  | 0.50     |
| PF01329.13         | Pterin 4 alpha carbinolamine dehydratase | 1                                        | 2                                  | 0.50     |
| PF10330.3          | Putative Sin3 binding protein            | 1                                        | 2                                  | 0.50     |

**Supplementary table 7: Proteins with homologs only in plant pathogens**

| <i>P. digitatum</i> PHI26 | <i>P. digitatum</i> Pd1 | Putative function                                                                                                                     |
|---------------------------|-------------------------|---------------------------------------------------------------------------------------------------------------------------------------|
| PDIG_00220                | NO BRH                  | Putative protein                                                                                                                      |
| PDIG_00560                | PDIP_02820              | Putative protein                                                                                                                      |
| PDIG_00610                | PDIP_02870              | Putative protein                                                                                                                      |
| PDIG_01130                | PDIP_12450              | <i>Similarity: the ORF shows also weak similarity to proteins containing PTS domain [Blast hit trembl: Aspergillus niger: A2QI06]</i> |
| PDIG_02400                | PDIP_13690              | <i>DNA mismatch repair protein pms1 [Ortholog: Verticillium albo-atrum : C9SJ63]</i>                                                  |
| PDIG_02720                | PDIP_13980              | <i>Putative uncharacterized protein [Blast hit trembl: Metarhizium robertsii: E9F3N7]</i>                                             |
| PDIG_03050                | NO BRH                  | <i>Predicted protein [Ortholog: Pyrenophora tritici-repentis : B2WJT8]</i>                                                            |
| PDIG_04460                | NO BRH                  | Putative protein                                                                                                                      |
| PDIG_04520                | PDIP_09180              | Putative protein                                                                                                                      |
| PDIG_04950                | PDIP_09620              | Putative succinate-semialdehyde dehydrogenase C1002.12c [NADP+]                                                                       |
| PDIG_06490                | PDIP_11130              | Putative protein                                                                                                                      |
| PDIG_07070                | PDIP_11720              | Putative protein                                                                                                                      |
| PDIG_07190                | PDIP_11840              | GDP-mannose-dependent alpha-mannosyltransferase                                                                                       |
| PDIG_07290                | PDIP_11940              | Putative protein                                                                                                                      |
| PDIG_07550                | PDIP_81670              | Putative protein                                                                                                                      |
| PDIG_07840                | PDIP_35880              | <i>Putative uncharacterized protein [Ortholog: Phaeosphaeria nodorum : Q0U7C4]</i>                                                    |
| PDIG_08260                | PDIP_36280              | Putative protein                                                                                                                      |
| PDIG_08680                | PDIP_36700              | Putative protein                                                                                                                      |
| PDIG_09760                | NO BRH                  | Putative protein                                                                                                                      |
| PDIG_11540                | PDIP_37790              | Putative protein                                                                                                                      |
| PDIG_13490                | PDIP_40620              | Uncharacterized transporter                                                                                                           |
| PDIG_13920                | PDIP_39570              | Putative protein                                                                                                                      |
| PDIG_15070                | PDIP_30600              | Putative uncharacterized protein                                                                                                      |
| PDIG_15360                | PDIP_30890              | Putative protein                                                                                                                      |
| PDIG_16000                | NO BRH                  | Putative protein                                                                                                                      |
| PDIG_16660                | PDIP_88170              | Putative protein                                                                                                                      |
| PDIG_17870                | PDIP_55740              | Putative protein                                                                                                                      |
| PDIG_17980                | NO BRH                  | Protein kinase                                                                                                                        |
| PDIG_18580                | PDIP_56410              | <i>Putative uncharacterized protein [Ortholog: Magnaporthe grisea : A4R093]</i>                                                       |
| PDIG_18920                | NO BRH                  | Putative protein                                                                                                                      |
| PDIG_20980                | PDIP_32170              | Putative protein                                                                                                                      |
| PDIG_20990                | PDIP_23270              | Putative protein                                                                                                                      |
| PDIG_21140                | PDIP_23420              | <i>Catechol O-methyltransferase [Ortholog: Pyrenophora tritici-repentis : B2WAW0]</i>                                                 |
| PDIG_21620                | PDIP_23900              | Putative protein                                                                                                                      |
| PDIG_25110                | PDIP_59600              | Putative protein                                                                                                                      |
| PDIG_26330                | NO BRH                  | Putative protein                                                                                                                      |
| PDIG_26590                | PDIP_61040              | <i>Mannan endo-1,4-beta-mannosidase F [Blast hit: Aspergillus clavatus: A1C8U0]</i>                                                   |
| PDIG_26730                | PDIP_61180              | <i>3-hydroxyacyl-CoA dehydrogenase, NAD binding domain, putative [Blast hit trembl: Metarhizium acridum: E9E516]</i>                  |
| PDIG_29480                | PDIP_63880              | <i>Putative uncharacterized protein [Blast hit trembl: Neosartorya fischeri: A1DGZ8]</i>                                              |
| PDIG_31970                | PDIP_51550              | Putative protein                                                                                                                      |



|            |            |                                                                                                    |
|------------|------------|----------------------------------------------------------------------------------------------------|
| PDIG_32280 | PDIP_51870 | Uncharacterized membrane protein                                                                   |
| PDIG_32420 | PDIP_52010 | Putative protein                                                                                   |
| PDIG_34180 | NO BRH     | Putative protein                                                                                   |
| PDIG_34460 | PDIP_54020 | Putative protein                                                                                   |
| PDIG_34890 | NO BRH     | Putative protein                                                                                   |
| PDIG_35620 | PDIP_05850 | Putative protein                                                                                   |
| PDIG_36250 | PDIP_05230 | Putative protein                                                                                   |
| PDIG_36330 | PDIP_05160 | <i>Putative uncharacterized protein [Ortholog: Verticillium albo-atrum : C9SZ05]</i>               |
| PDIG_37970 | PDIP_84550 | Putative protein                                                                                   |
| PDIG_38400 | PDIP_85030 | Putative protein                                                                                   |
| PDIG_38980 | PDIP_46900 | Putative protein                                                                                   |
| PDIG_39000 | PDIP_46920 | <i>Endonuclease/exonuclease/phosphatase family [Ortholog: Verticillium albo-atrum : C9SNJ1]</i>    |
| PDIG_39010 | NO BRH     | Putative protein                                                                                   |
| PDIG_39400 | PDIP_24950 | Putative protein                                                                                   |
| PDIG_41340 | NO BRH     | Putative protein                                                                                   |
| PDIG_41360 | PDIP_86260 | Putative protein                                                                                   |
| PDIG_41450 | PDIP_86360 | <i>Putative uncharacterized protein [Blast hit trembl: Metarhizium robertsii: E9EUZ3]</i>          |
| PDIG_42340 | PDIP_40920 | Putative agmatinase 1                                                                              |
| PDIG_43120 | PDIP_41690 | Putative protein                                                                                   |
| PDIG_43370 | PDIP_34600 | Putative protein                                                                                   |
| PDIG_43910 | PDIP_35140 | Putative protein                                                                                   |
| PDIG_45380 | PDIP_17320 | Putative protein                                                                                   |
| PDIG_45730 | PDIP_17670 | <i>Putative uncharacterized protein [Ortholog: Pyrenophora tritici-repentis : B2W554]</i>          |
| PDIG_46440 | PDIP_18360 | Putative protein                                                                                   |
| PDIG_46930 | PDIP_18850 | Putative protein                                                                                   |
| PDIG_47080 | PDIP_19010 | Putative protein                                                                                   |
| PDIG_47560 | PDIP_56940 | Putative protein                                                                                   |
| PDIG_47870 | PDIP_57250 | <i>Putative uncharacterized protein [Ortholog: Verticillium albo-atrum : C9SM17]</i>               |
| PDIG_47980 | PDIP_57360 | <i>ABC-type Fe<sup>3+</sup> transport system [Ortholog: Pyrenophora tritici-repentis : B2W446]</i> |
| PDIG_48830 | PDIP_58210 | <i>Serine/threonine-protein kinase tel1 [Blast hit: Neosartorya fumigata: Q4WVM7]</i>              |
| PDIG_49940 | PDIP_85680 | Putative protein                                                                                   |
| PDIG_53670 | PDIP_48890 | Structure-specific endonuclease subunit slx1                                                       |
| PDIG_56960 | PDIP_66510 | Putative protein                                                                                   |
| PDIG_57010 | PDIP_66560 | Putative protein                                                                                   |
| PDIG_60480 | PDIP_69890 | 40S ribosomal protein S26E                                                                         |
| PDIG_61260 | PDIP_70690 | Putative protein                                                                                   |
| PDIG_63520 | PDIP_72890 | Putative protein                                                                                   |
| PDIG_67200 | PDIP_76500 | Putative protein                                                                                   |
| PDIG_67430 | PDIP_76730 | Putative protein                                                                                   |
| PDIG_68380 | PDIP_77670 | Putative protein                                                                                   |
| PDIG_68400 | PDIP_77690 | Putative protein                                                                                   |
| PDIG_68870 | PDIP_78150 | Putative protein                                                                                   |
| PDIG_70100 | PDIP_79400 | Putative protein                                                                                   |

|            |            |                                                                                      |
|------------|------------|--------------------------------------------------------------------------------------|
| PDIG_70220 | PDIP_79530 | Putative protein                                                                     |
| PDIG_77640 | PDIP_04750 | Putative protein                                                                     |
| PDIG_81120 | PDIP_29470 | <i>Putative uncharacterized protein [Ortholog: Phaeosphaeria nodorum : Q0V054]</i>   |
| PDIG_81140 | PDIP_29490 | <i>Decarboxylase DEC1 [Ortholog: Verticillium albo-atrum : C9SYL7]</i>               |
| PDIG_81950 | PDIP_30300 | <i>Putative uncharacterized protein [Ortholog: Verticillium albo-atrum : C9SMP8]</i> |
| PDIG_82740 | PDIP_86530 | Tryptophan synthase                                                                  |
| PDIG_84030 | PDIP_21690 | <i>Putative uncharacterized protein [Ortholog: Phaeosphaeria nodorum : Q0U0D9]</i>   |
| PDIG_86650 | PDIP_32660 | Putative protein                                                                     |
| PDIG_86700 | PDIP_32710 | <i>Predicted protein [Ortholog: Pyrenophora tritici-repentis : B2VUA5]</i>           |
| PDIG_87400 | PDIP_33430 | Putative protein                                                                     |
| PDIG_90260 | PDIP_07190 | Putative protein                                                                     |
| PDIG_90270 | PDIP_07200 | Putative protein                                                                     |
| PDIG_90740 | PDIP_07660 | Putative protein                                                                     |
| PDIG_90850 | PDIP_07770 | Putative protein                                                                     |

NO BRH: No best reciprocal hit was found in the PHI26 strain

**Supplementary table 8: Putative horizontal transfer genes from prokaryotes**

| <b><i>P. digitatum</i> PHI26</b> | <b><i>P. digitatum</i> Pd1</b> | <b>Putative function</b>                  |
|----------------------------------|--------------------------------|-------------------------------------------|
| PDIG_50040                       | PDIP_19280                     | Lipase class 2                            |
| PDIG_21040                       | PDIP_23320                     | ADP-L-glycero-D-manno-heptose-6-epimerase |
| PDIG_81140                       | PDIP_29490                     | Decarboxylase DEC1                        |
| PDIG_86690                       | PDIP_32700                     | Putative thiosulfate sulfurtransferase    |

**Supplementary table 9: Predicted secondary metabolism related genes**

| Species                                  | NRPS | PKS | DMAT | PKS-NRPS HYBRID |
|------------------------------------------|------|-----|------|-----------------|
| <i>Ajellomyces capsulata</i>             | 9    | 2   | 1    | 0               |
| <i>Aspergillus carbonarius</i>           | 25   | 19  | 2    | 5               |
| <i>Aspergillus clavatus</i>              | 18   | 17  | 3    | 4               |
| <i>Aspergillus flavus</i>                | 32   | 24  | 9    | 3               |
| <i>Aspergillus fumigatus</i>             | 18   | 15  | 7    | 1               |
| <i>Aspergillus niger</i>                 | 21   | 17  | 1    | 1               |
| <i>Botrytis fuckeliana</i>               | 14   | 22  | 1    | 0               |
| <i>Coccidioides immitis</i>              | 8    | 11  | 1    | 1               |
| <i>Cochliobolus heterostrophus</i>       | 15   | 20  | 3    | 0               |
| <i>Cryphonectria parasitica</i>          | 11   | 27  | 2    | 5               |
| <i>Emericella nidulans</i>               | 21   | 31  | 6    | 1               |
| <i>Fusarium oxysporum</i>                | 17   | 11  | 2    | 2               |
| <i>Gaeumannomyces graminis</i>           | 8    | 15  | 0    | 2               |
| <i>Gibberella zeae</i>                   | 21   | 15  | 0    | 1               |
| <i>Glomerella graminicola</i>            | 12   | 38  | 6    | 4               |
| <i>Magnaporthe grisea</i>                | 13   | 24  | 3    | 5               |
| <i>Magnaporthe oryzae 70-15</i>          | 14   | 26  | 3    | 5               |
| <i>Mycosphaerella graminicola</i>        | 12   | 13  | 0    | 0               |
| <i>Nectria haematococca</i>              | 12   | 13  | 1    | 1               |
| <i>Neurospora crassa</i>                 | 5    | 8   | 1    | 0               |
| <i>Penicillium chrysogenum</i>           | 24   | 23  | 1    | 2               |
| <i>Penicillium digitatum PHI26</i>       | 13   | 14  | 1    | 3               |
| <i>Penicillium marneffeii ATCC 18224</i> | 19   | 26  | 2    | 1               |
| <i>Phaeosphaeria nodorum</i>             | 12   | 18  | 2    | 1               |
| <i>Pyrenophora tritici-repentis</i>      | 18   | 20  | 0    | 1               |
| <i>Sclerotinia sclerotiorum</i>          | 10   | 18  | 1    | 0               |
| <i>Talaromyces stipitatus</i>            | 21   | 39  | 1    | 2               |
| <i>Uncinocarpus reesii</i>               | 12   | 5   | 3    | 1               |
| <i>Verticillium albo-atrum</i>           | 13   | 10  | 0    | 1               |

NRPS

Non-Ribosomal Peptide Synthetase

PKS

Polyketide Synthase

DMAT

Dimethyl allyl tryptophan synthase

| <b>Supplementary table 10: dN / dS analysis of patulin related genes</b> |                   |                       |                     |
|--------------------------------------------------------------------------|-------------------|-----------------------|---------------------|
| <b>Gene name</b>                                                         | <b>Synonymous</b> | <b>Non-synonymous</b> | <b>Omega</b>        |
| <i>patB</i>                                                              | 122               | 103                   | 0.84                |
| <i>patC</i>                                                              | 190               | 143                   | 0.75                |
| <i>patD</i>                                                              | 58                | 54                    | 0.93                |
| <i>patF</i>                                                              | 56                | 37                    | 0.66                |
| <i>patG</i>                                                              | 141               | 76                    | 0.54                |
| <i>patJ</i>                                                              | 56                | 65                    | 1.16                |
| <i>patL</i>                                                              | 259               | 258                   | 1.00                |
| <b>Additional analysis</b>                                               |                   |                       | <b>Median omega</b> |
| Glycolysis related proteins                                              |                   |                       | 0.53                |
| One-to-one orthologs                                                     |                   |                       | 0.82                |

Supplementary table 11: Putative small CRPs

| Gene name      | Scaffolds   | Start   | Stop    | Frame | Sequence                                                                                                                                 |
|----------------|-------------|---------|---------|-------|------------------------------------------------------------------------------------------------------------------------------------------|
| PDIG_31210     | Scaffold 33 | 91663   | 91908   | +     | MASGSCRCHCIYTACTPLTYLVSCHCTTCRQKQAGAPYQTWAIFTTDDIRWHVNPTEGQVTNEATRTLCPQCSSTIKAFLA                                                        |
| PDIG_68840     | Scaffold 50 | 3576204 | 3576602 | +     | MQITSIAILFTAMGAVANPIATASDDLARDVQLSKYGGQCSLKHNTCTYLKGGRNIVNCGSAANKRCKSDRHHCEYDEHRRVDCQTPV                                                 |
| PDIG_70730     | Scaffold 50 | 4111344 | 4111757 | -     | MKDSLSAVILLSILECLSRILFSPESPCTTPYSPDKQHHLRLAHRRIHPAYGVDIYALDAQNLPQFINSKAKNCQSHPLMLSVKMGVGLWLDKTLGEIERRKDVPS<br>SCRFCRSRQSKTKCRVNDIVPHWQ   |
| PdigORF_53727  | Scaffold 1  | 264893  | 265069  | -     | MIVSVQHPPGCLCVTMYTAVVSSSAHTDTCTTIFMDSSCFWFASDGKPSQSHIVQAK                                                                                |
| PdigORF_53445  | Scaffold 1  | 283568  | 283690  | +     | MSRLTGCESRNRRLCRCLLLLQQLTPRRCHMVGQCYYIC                                                                                                  |
| PdigORF_90395  | Scaffold 11 | 169285  | 169578  | -     | MKGAFKTVLWHLPFTELVSASGLSARQVRFDCAKPTQGSQDPWVGLNITKHCNLQRSIGFCTEIAKVHTYTCPQLSTWKVYCMDTLRLDYGYTCYT                                         |
| PdigORF_90437  | Scaffold 11 | 273317  | 273538  | -     | MSLLVSCSGFLCLLVFKVIPVWTEGLDIKYEYICFPCALTSQSLIFQSSPLFFLLSHDIGAGRDMLFT                                                                     |
| PdigORF_102414 | Scaffold 12 | 170618  | 170824  | -     | MYLSSLFFYFGTSCSAMTFCDISLGCLNRICHPPRLHQFHAKLLRKSRLSGSLCSPSILIKHPLVC                                                                       |
| PdigORF_111041 | Scaffold 19 | 469429  | 469515  | +     | MWITLGFICIHGASARACRMVCAKT                                                                                                                |
| PdigORF_55955  | Scaffold 2  | 321333  | 321491  | -     | MASLCSSSLERFSLLEILLVGSSTWSLSLQVCCQRKQRTCTSTVPAVDSLKE                                                                                     |
| PdigORF_56977  | Scaffold 2  | 342361  | 342459  | -     | MSCTLSVVLFTPYLCLYFCRDCAYTCDRTFTC                                                                                                         |
| PdigORF_57111  | Scaffold 2  | 349919  | 350032  | -     | MSRVTCVTTSCPICGICLGKREIDASVFTRRKTVEDG                                                                                                    |
| PdigORF_54558  | Scaffold 2  | 552596  | 552787  | -     | MTPVRQFSSAITRVRTLWMFPRVFTSSRASSRVRYCLFAGMHGCTCTCAWDRDEQVPASSFEM                                                                          |
| PdigORF_111713 | Scaffold 20 | 200420  | 200563  | +     | MCLLITLVEHLLSKSSSHALSDTSPRCTSPCTQEHDKTTRVIMFR                                                                                            |
| PdigORF_3765   | Scaffold 23 | 87423   | 87512   | -     | MGPPFRCKGCLTRCLSALAAVLCYPSFLV                                                                                                            |
| PdigORF_3886   | Scaffold 23 | 347544  | 347627  | +     | MARRSPLVIFLCMCHGFIFNMCRCTLE                                                                                                              |
| PdigORF_50949  | Scaffold 29 | 349466  | 349579  | +     | MCLFPGCKNIRTECALVILSCIGHLHSDDFISTKLDF                                                                                                    |
| PdigORF_51191  | Scaffold 29 | 425176  | 425271  | -     | MEFATLVEMGCLFACQSGANGPEKICGPCGP                                                                                                          |
| PdigORF_52634  | Scaffold 30 | 4444    | 4593    | +     | MLLILATAVVVISIERKACIHCSSSDIQNSPDLNDVISSCTFRVRCVLG                                                                                        |
| PdigORF_24764  | Scaffold 31 | 39307   | 39435   | -     | MSLFLPSTCCLVLRVHEELLNLQLFCSVSMLEIDSFSPM                                                                                                  |
| PdigORF_24923  | Scaffold 31 | 310273  | 310371  | +     | MGLAWCILLRCIADLAAPAICLCHAQQVDQAA                                                                                                         |
| PdigORF_85491  | Scaffold 32 | 540513  | 540638  | -     | MVLFVTRVLYPGCCQVFLAQIRWCLCKRTLIIQICWE                                                                                                    |
| PdigORF_83860  | Scaffold 32 | 915897  | 915977  | +     | MGCLRNSLCPAFLCSSHTRGERVCDQ                                                                                                               |
| PdigORF_85940  | Scaffold 32 | 1010634 | 1011035 | -     | MEKLVCVLILPLRHGLSYICMSSKPAATWRRHQMHFYFSIPIFILSICKLTPSPHDHLICSLNISNTRDCAQLAQQRGTSQLNCFANQFDVGDVEFFRQINEACCCGDKIGDEE<br>IVVNRVAVVTAYHANREC |
| PdigORF_89251  | Scaffold 32 | 1105916 | 1106083 | +     | MHPTHHLVRPPSLASVSTALCPQCPHPTQAVSHNCFRRYSAPRPFVLPFTAKL                                                                                    |
| PdigORF_87691  | Scaffold 32 | 1530898 | 1530984 | -     | MTSGCCSGALLICFSLAQCTAGKKYLA                                                                                                              |
| PdigORF_68422  | Scaffold 33 | 689358  | 689639  | -     | MRKRALWSIFSGVNRHSSCGDRVTRVKIGHPSCLCPLGQEAFTFEENDNHVESIYLCAIATFTEITKENPESGHNPSISACNAVLHSSMICPI                                            |
| PdigORF_70940  | Scaffold 33 | 722410  | 722553  | -     | MLLFLLLVNSRRGLCCTQVFGGLSNGNCARLSTTCAVDRVLLIAHFM                                                                                          |
| PdigORF_62353  | Scaffold 34 | 199115  | 199201  | -     | MNWGIYCCAGVRCCAASLSIIKKHANQ                                                                                                              |
| PdigORF_61735  | Scaffold 34 | 319644  | 319811  | -     | MVASSRDLWRPSCCLTVSMFVLTCAQMTQHNVPRNIIMEGNHGWEPWMDIES                                                                                     |
| PdigORF_65543  | Scaffold 36 | 11367   | 11477   | -     | MLLVVALGCSQKNDAAARCCGPVYSCVQHPPISIFED                                                                                                    |
| PdigORF_93050  | Scaffold 38 | 357400  | 357591  | +     | MRRGLAFIFISAGLEELRQMQISQHCIAAEPFYCATICTGDCNQNEYKSRESELSESNFNL                                                                            |
| PdigORF_99072  | Scaffold 39 | 79580   | 79693   | -     | MSMFCLFACAPCSFVCLSHYMQGFHAGLCPKFKIACV                                                                                                    |
| PdigORF_99626  | Scaffold 39 | 492550  | 492774  | +     | MPSVLSPVSCCFLLVPSEKIEEQVSTVYEDCLRLVAQKSPCQLGPSFLLVVFAPNGFSVCRHALCKNTMTLEWI                                                               |
| PdigORF_100976 | Scaffold 39 | 762402  | 762527  | -     | MKSGVFRLLFSCNTCCTSLDCKNVHFIGINVIFWGVSLIF                                                                                                 |
| PdigORF_105377 | Scaffold 41 | 103143  | 103250  | -     | MVFSLFCPLFFTSVYSPSPFCQDQIFRICCIVKDGA                                                                                                     |
| PdigORF_5325   | Scaffold 42 | 127246  | 127368  | -     | MTGGIGITVLCCHAATERVSGCLSIECIEGKWSRFPFR                                                                                                   |
| PdigORF_106377 | Scaffold 45 | 361915  | 361986  | -     | MFTCSLYLSGLFCRCLSYLVDS                                                                                                                   |
| PdigORF_74990  | Scaffold 5  | 26526   | 26696   | +     | MCYHSCFLPLACCTSVVQGVQITGPLLKFLFRPVSSNIYPIQTSISWSHITTF                                                                                    |
| PdigORF_73652  | Scaffold 5  | 365341  | 365490  | -     | MKCCCTGSLAYPYLSLSTFAWDSTSAWFTFGHCSCCLKRFLGWKGSSDL                                                                                        |
| PdigORF_43334  | Scaffold 50 | 284679  | 284804  | +     | MFLALLCLVLCVPGRRGHDLPCVRCACVFLGSWARLVGVC                                                                                                 |
| PdigORF_43247  | Scaffold 50 | 656334  | 656468  | +     | MKNPLLILAMFIGVRCRQVYSTLPGTSTPTIPVSVESGRGCGSC                                                                                             |
| PdigORF_45973  | Scaffold 50 | 698735  | 698815  | -     | MWITYLLVHCLPAACYRRCHYVLCIP                                                                                                               |
| PdigORF_45819  | Scaffold 50 | 789013  | 789126  | -     | MTCLHFLHTLVCSWEVCTCVCTDVVPRGRSSGDRH                                                                                                      |
| PdigORF_33650  | Scaffold 50 | 1354925 | 1355062 | +     | MSLVRCSASGLQGLSACIRSAPGVGLNLSRSLSDPSIGYTCQDPC                                                                                            |
| PdigORF_35147  | Scaffold 50 | 1585110 | 1585397 | +     | MTSRRPLSEHIIGIILLNVLRSNCHASCASNASSAHISCLMDCDALLKIIHRFRLCDMCHLLKLLCADTPRSASVIHNPTHCLSFFIRSAESL                                            |
| PdigORF_44313  | Scaffold 50 | 1702099 | 1702263 | +     | MVPRGICKRPKSSPLFFSSPSGVHCDMVRMYNIQHTCTCRCTSSCSFLPRYIR                                                                                    |
| PdigORF_29232  | Scaffold 50 | 3093700 | 3093840 | -     | MPPCLFAMCFRSLIFIGRNVSPLVLRICIFCFEGCAFVPSVLLVRC                                                                                           |

|               |             |         |         |   |                                                                                                               |
|---------------|-------------|---------|---------|---|---------------------------------------------------------------------------------------------------------------|
| PdigORF_33373 | Scaffold 50 | 3829551 | 3829811 | - | MSLSTWVFCIHGVWTQNLVLYHYVGCFLFISNLFHECTTCTGFPFVTSSQAAHIVISFYAGGQPASRRPLVSGARSRKSASHESRGT                       |
| PdigORF_26722 | Scaffold 50 | 4315795 | 4315968 | + | MVFIRFYWLISLHLLQCPCIPLYPCRNPTSTSENFIFALLYILADFQPCCHSLAYYTD                                                    |
| PdigORF_35205 | Scaffold 50 | 4343978 | 4344124 | - | MFAFGCLGMCIALYVFSYMSQCVNICLPESCVRNRNSAWLTEQNICWK                                                              |
| PdigORF_48793 | Scaffold 51 | 115720  | 115995  | + | MTTSCLLSGCISLTSSQSMALRQSLHTCSFTCGCGMMDLTASQLPSSLYQGIVRNDHLLKSHCVRFVNDGASSVSGSDTRPNQAAVFGLL                    |
| PdigORF_48067 | Scaffold 51 | 285565  | 285762  | + | MSKLGSMKRGGCTYVHPAFVVASVSVSGFPSSKNTVCCPTLPFLCSDHDFHRGPSSFATTL                                                 |
| PdigORF_49497 | Scaffold 51 | 492002  | 492169  | - | MKKYLARASRILLVSRVLPVLCDFSFKNPQMSCFCSLYLLPMSCGRGNQVVFML                                                        |
| PdigORF_46847 | Scaffold 51 | 514418  | 514753  | + | MYNGMMLPLTGPKGRFARRGVLGLLSFAGEGLLSDLGVCPVLTHLLASHERIFSFLIKFSNPSSKLCVCAVIRHFCCHLLRLCFTRCRSSTRIENRCKIQVCCVTHLFL |
| PdigORF_46712 | Scaffold 51 | 893926  | 894111  | - | MHLTRLVVFTLFYSAVALPLQHCSTKPSVWCCQALVLQHRTKGLVLRDLSRPRYTCRPWAL                                                 |
| PdigORF_50378 | Scaffold 51 | 950028  | 950126  | + | MLKYQYHPLACLFYLTLYCWPTLCVKCVHPAS                                                                              |
| PdigORF_96454 | Scaffold 67 | 7985    | 8059    | - | MTICCTLVRFGLGPCMGFHFCDGSV                                                                                     |
| PdigORF_11312 | Scaffold 72 | 809714  | 809923  | + | MLMHVQLRIPFLLTIPFPEVYCDLTPCVLFFSCSSPSAFVFAHFYIVLTPSGYHIIYLLSVCHVL                                             |
| PdigORF_10734 | Scaffold 72 | 976703  | 976900  | + | MSCITSHSSRAYVFLFFGGWGERRVLCHCCPSTNLPFTPIFSLFSLTPRMPLTRLFNTSAWLLS                                              |
| PdigORF_10750 | Scaffold 72 | 978902  | 979024  | - | MHSFIYAMFNLLCELCHLSWGGHQELCSSGRTDEHHCTIH                                                                      |
| PdigORF_11328 | Scaffold 72 | 1122014 | 1122163 | + | MVMDGTSSMLACFLLFSAGQPCSSCRSSPFWGWLVLDGTLGTCLNLGIGV                                                            |
| PdigORF_16297 | Scaffold 73 | 370633  | 370710  | - | MQPIPFSSLCVCSSSCRAPWIGCLL                                                                                     |
| PdigORF_17085 | Scaffold 74 | 3127    | 3282    | + | MSQSTCVFPRKPHNRPRPYCTGFWGLLMTGVSADHGPRRKASYLGCVTCES                                                           |
| PdigORF_18868 | Scaffold 75 | 196085  | 196348  | + | MARQNPLGSDALEAAEKAENHVARGVCQLLLSLPAACLACPMTKKSWLTKDPQMEIQVVAVRLALRASLDCISTWLQIATFEIVLRTP                      |
| PdigORF_19089 | Scaffold 75 | 408748  | 408948  | + | MSYSILFPTCILSSGFPMGKCHTILWILQPIMSLTLQLCTLPKLGTPSTSKGTILGQLQYVHCRNW                                            |
| PdigORF_19449 | Scaffold 75 | 423489  | 423623  | - | MTGALSTTLVVMGLLGRPEVWGCKTCGPNCTPYEPCRTYRPIWN                                                                  |
| PdigORF_20742 | Scaffold 78 | 502882  | 503028  | - | MDTATKSSVLCISTICTCVNQTTSVSKMDLSCNIPLLTVTRRNFVL                                                                |
| PdigORF_77644 | Scaffold 8  | 120175  | 120261  | - | MSIKCPKFLFSGFWLSWPCRYCRSGSQ                                                                                   |
| PdigORF_79422 | Scaffold 8  | 207212  | 207295  | - | MKCNLFLCLTLQPSLDCRADCIPTYRQ                                                                                   |
| PdigORF_77787 | Scaffold 8  | 406203  | 406358  | + | MIYISLASVSCVLTPEPCPEPCLVVCFTSTQARYPNFSKGLAIPKIF                                                               |
| PdigORF_79798 | Scaffold 9  | 49243   | 49416   | + | MLCWVSPFMMPHLLPLCLKYCITYACLVDACILRREHFPCIQFRSGGSEKRRSLRGS                                                     |
| PdigORF_1017  | Scaffold 90 | 421151  | 421246  | + | MCIQITGCALIASGICLPLPTSLFGKRKICR                                                                               |

**Supplementary table 12: Putative LysM proteins**

| <b><i>P. digitatum</i> PHI26</b> | <b><i>P. digitatum</i> Pd1</b> | <b>Putative function</b>                                                         |
|----------------------------------|--------------------------------|----------------------------------------------------------------------------------|
| PDIG_25220                       | PDIP_59710                     | Putative uncharacterized protein [Ortholog: <i>Emericella nidulans</i> : Q5AYG6] |
| PDIG_25240                       | PDIP_59730                     | Predicted protein [Ortholog: <i>Neurospora crassa</i> : Q7SG57]                  |
| PDIG_23650                       | PDIP_16060                     | LysM domain protein [Ortholog: <i>Aspergillus clavatus</i> : A1CNR4]             |
| PDIG_42020                       | PDIP_06030                     | Putative protein                                                                 |
| PDIG_20490                       | PDIP_00110                     | Putative uncharacterized protein [Ortholog: <i>Emericella nidulans</i> : Q5BA48] |
| PDIG_22820                       | PDIP_15220                     | LysM domain protein, putative [Ortholog: <i>Aspergillus fumigatus</i> : Q4W9R4]  |
| PDIG_12980                       | PDIP_39200                     | LysM domain protein, putative [Ortholog: <i>Aspergillus fumigatus</i> : A4D9P3]  |



**Supplementary table 13: Total Carbohydrate-active enzyme and associated (CAZy) modules**

| <b>Species</b>                     | <b>Glycoside hydrolase</b> | <b>Glycosyltransferase</b> | <b>Polysaccharide lyase</b> | <b>Carbohydrate esterases</b> | <b>Carbohydrate-binding module</b> | <b>Enzyme modules</b> | <b>GH+PL+CE modules</b> | <b>Auxilliar modules</b> | <b>Total CAZY modules</b> |
|------------------------------------|----------------------------|----------------------------|-----------------------------|-------------------------------|------------------------------------|-----------------------|-------------------------|--------------------------|---------------------------|
| <i>Penicillium digitatum</i> PHI26 | 170                        | 60                         | 7                           | 9                             | 29                                 | 246                   | 186                     | 29                       | 275                       |
| <i>Penicillium digitatum</i> Pd1   | 169                        | 60                         | 7                           | 9                             | 30                                 | 245                   | 185                     | 30                       | 275                       |
| <i>Penicillium chrysogenum</i>     | 237                        | 78                         | 11                          | 10                            | 47                                 | 336                   | 258                     | 47                       | 383                       |
| <i>Botrytis cinerea</i>            | 248                        | 68                         | 16                          | 18                            | 64                                 | 350                   | 282                     | 64                       | 414                       |

**Supplementary table 14: List of putatively secreted *P. digitatum* proteins**

| <i>P. digitatum</i> PHI26 | <i>P. digitatum</i> Pd1 | Annotation                                                                                                         |
|---------------------------|-------------------------|--------------------------------------------------------------------------------------------------------------------|
| PDIG_00070                | PDIP_02360              | Putative uncharacterized protein [Ortholog: <i>Aspergillus fumigatus</i> : A4DA38]                                 |
| PDIG_00130                | PDIP_02410              | Putative uncharacterized protein [Ortholog: <i>Magnaporthe grisea</i> : A4REJ2]                                    |
| PDIG_00170                | PDIP_02450              | Putative uncharacterized protein [Ortholog: <i>Aspergillus fumigatus</i> : Q4WCC7]                                 |
| PDIG_00300                | PDIP_02560              | Probable beta-glucosidase L [Ortholog: <i>Emericella nidulans</i> : Q5B9F2]                                        |
| PDIG_00330                | PDIP_02590              | Putative uncharacterized protein [Ortholog: <i>Aspergillus fumigatus</i> : Q4WUP3]                                 |
| PDIG_00340                | PDIP_02600              | Serine carboxypeptidase (CpdS), putative [Ortholog: <i>Talaromyces stipitatus</i> : B8MPH0]                        |
| PDIG_00380                | PDIP_02640              | Putative protein                                                                                                   |
| PDIG_00420                | PDIP_02680              | Beta-N-acetylhexosaminidase [Ortholog: <i>Penicillium chrysogenum</i> : Q9URR8]                                    |
| PDIG_00460                | PDIP_02720              | Putative protein                                                                                                   |
| PDIG_00570                | PDIP_02830              | Putative protein                                                                                                   |
| PDIG_00580                | PDIP_02840              | Glucose oxidase, putative [Ortholog: <i>Talaromyces stipitatus</i> : B8MDS4]                                       |
| PDIG_00610                | PDIP_02870              | Putative protein                                                                                                   |
| PDIG_00660                | PDIP_02920              | Endo-1,4-beta-xylanase [Ortholog: <i>Penicillium chrysogenum</i> : B6F254]                                         |
| PDIG_00670                | PDIP_02930              | DUF821 domain protein [Ortholog: <i>Aspergillus fumigatus</i> : Q4X047]                                            |
| PDIG_00750                | PDIP_03010              | Similar to Pc12g01740 protein [Blast hit trembl: <i>Penicillium chrysogenum</i> : B6GZ47]                          |
| PDIG_00760                | PDIP_03020              | Putative uncharacterized protein [Ortholog: <i>Emericella nidulans</i> : Q5AZ94]                                   |
| PDIG_00770                | PDIP_03030              | Oxalate decarboxylase, putative [Ortholog: <i>Aspergillus fumigatus</i> : Q4X060]                                  |
| PDIG_00900                | PDIP_12220              | Protease S8 tripeptidyl peptidase I, putative [Ortholog: <i>Talaromyces stipitatus</i> : B8MIE2]                   |
| PDIG_01210                | PDIP_12530              | Putative uncharacterized protein [Ortholog: <i>Emericella nidulans</i> : Q5B4T4]                                   |
| PDIG_01260                | PDIP_12580              | 1,3-beta-glucanosyltransferase Gel3 [Ortholog: <i>Aspergillus clavatus</i> : A1C6W2]                               |
| PDIG_01380                | PDIP_12700              | Similar to Pc22g18570 protein [Blast hit trembl: <i>Penicillium chrysogenum</i> : B6HUM9]                          |
| PDIG_01480                | PDIP_12800              | Putative uncharacterized protein [Ortholog: <i>Emericella nidulans</i> : Q5B4V0]                                   |
| PDIG_01560                | PDIP_12880              | Whole genome shotgun sequence assembly, scaffold_9 [Blast hit trembl: <i>Sordaria macrospora</i> : D1Z8L2]         |
| PDIG_01660                | PDIP_12990              | Cytochrome P450 monooxygenase, putative [Ortholog: <i>Aspergillus fumigatus</i> : Q4WR20]                          |
| PDIG_01700                | PDIP_13030              | Aspartyl proteinase [Ortholog: <i>Coccidioides immitis</i> : Q9P8Y4]                                               |
| PDIG_01760                | PDIP_13090              | Aspartic-type endopeptidase ctsD [Ortholog: <i>Aspergillus fumigatus</i> : Q4WNV0]                                 |
| PDIG_01970                | PDIP_13300              | Protein ecm33 [Ortholog: <i>Aspergillus fumigatus</i> : Q4WNS8]                                                    |
| PDIG_02120                | PDIP_13450              | Similar to Pc22g17730 protein [Blast hit trembl: <i>Penicillium chrysogenum</i> : B6HT95]                          |
| PDIG_02140                | PDIP_13470              | Allergen Asp f 7 [Blast hit: <i>Neosartorya fumigata</i> : O42799]                                                 |
| PDIG_02170                | PDIP_13500              | Acid sphingomyelinase, putative [Ortholog: <i>Aspergillus fumigatus</i> : Q4WNR0]                                  |
| PDIG_02340                | PDIP_13630              | Putative protein                                                                                                   |
| PDIG_02650                | PDIP_13910              | Similar to Pc22g17200 protein [Blast hit trembl: <i>Penicillium chrysogenum</i> : B6HSE4]                          |
| PDIG_02660                | PDIP_13920              | Similar to Pc22g17190 protein [Blast hit trembl: <i>Penicillium chrysogenum</i> : B6HSE3]                          |
| PDIG_02780                | PDIP_14040              | Putative uncharacterized protein [Ortholog: <i>Emericella nidulans</i> : Q5ATD7]                                   |
| PDIG_02800                | PDIP_14060              | Similar to putative uncharacterized protein Pc22g17040 [Blast hit trembl: <i>Penicillium chrysogenum</i> : B6HSC8] |
| PDIG_02840                | PDIP_14100              | Protein get1 [Ortholog: <i>Talaromyces stipitatus</i> : B8LUE3]                                                    |
| PDIG_03040                | PDIP_31200              | Histidine acid phosphatase, putative [Ortholog: <i>Talaromyces stipitatus</i> : B8M1R5]                            |
| PDIG_03380                | PDIP_08080              | Pectin lyase B [Ortholog: <i>Aspergillus fumigatus</i> : Q4WGH2]                                                   |
| PDIG_04310                | PDIP_08970              | Similar to putative uncharacterized protein Pc20g03320 [Blast hit trembl: <i>Penicillium chrysogenum</i> : B6HG20] |
| PDIG_04400                | PDIP_09060              | Lipoyl synthase, mitochondrial [Ortholog: <i>Aspergillus fumigatus</i> : Q4WWP1]                                   |
| PDIG_04820                | PDIP_09490              | Putative uncharacterized protein [Ortholog: <i>Emericella nidulans</i> : Q5B3S3]                                   |
| PDIG_04880                | PDIP_09550              | Putative uncharacterized protein [Ortholog: <i>Pyrenophora tritici-repentis</i> : B2W8K8]                          |
| PDIG_04960                | PDIP_09630              | FAD binding domain protein [Ortholog: <i>Aspergillus clavatus</i> : A1CJI2]                                        |
| PDIG_04980                | PDIP_09650              | Class V chitinase, putative [Ortholog: <i>Aspergillus fumigatus</i> : A4D9F7]                                      |
| PDIG_05040                | PDIP_09710              | Polysaccharide deacetylase, putative [Ortholog: <i>Talaromyces stipitatus</i> : B8MMH0]                            |
| PDIG_05050                | PDIP_09720              | Putative uncharacterized protein [Ortholog: <i>Aspergillus fumigatus</i> : Q4WWWV6]                                |
| PDIG_05130                | PDIP_09800              | Putative uncharacterized protein [Ortholog: <i>Aspergillus clavatus</i> : A1CJJ6]                                  |
| PDIG_05140                | PDIP_09810              | Similar to Pc20g02100 protein [Blast hit trembl: <i>Penicillium chrysogenum</i> : B6HE84]                          |
| PDIG_05300                | PDIP_09970              | Phospholipase C PLC-C [Ortholog: <i>Aspergillus fumigatus</i> : Q58I93]                                            |

|            |            |                                                                                                                                        |
|------------|------------|----------------------------------------------------------------------------------------------------------------------------------------|
| PDIG_05350 | PDIP_10020 | <i>Pectin methylesterase, putative [Ortholog: Aspergillus fumigatus : Q4WWZ5]</i>                                                      |
| PDIG_05640 | PDIP_10310 | <i>Putative uncharacterized protein [Ortholog: Emericella nidulans : Q5AYZ4]</i>                                                       |
| PDIG_05650 | PDIP_10320 | <i>Similar to Pc15g00980 protein [Blast hit trembl: Penicillium chrysogenum : B6H6P2]</i>                                              |
| PDIG_06150 | PDIP_10830 | <i>Phosphatidylglycerol/phosphatidylinositol transfer protein [Ortholog: Emericella nidulans : Q5B0Q1]</i>                             |
| PDIG_06190 | PDIP_10870 | <i>GPI-anchored cell wall beta-1,3-endoglucanase EglC [Ortholog: Talaromyces stipitatus : B8MGA7]</i>                                  |
| PDIG_06500 | PDIP_11140 | <i>Glucose N-acetyltransferase 1 [Blast hit: Gibberella zeae: Q4HVS2]</i>                                                              |
| PDIG_06520 | PDIP_11160 | <i>Similar to Pc21g22790 protein [Blast hit trembl: Penicillium chrysogenum : B6HNY1]</i>                                              |
| PDIG_06770 | PDIP_11420 | <i>Putative uncharacterized protein [Ortholog: Aspergillus fumigatus : Q4WRH4]</i>                                                     |
| PDIG_06820 | PDIP_11470 | <i>Probable glycosidase crf1 [Ortholog: Aspergillus fumigatus : Q8J0P4]</i>                                                            |
| PDIG_06910 | PDIP_11560 | Putative protein                                                                                                                       |
| PDIG_07090 | PDIP_11740 | <i>Beta-xylosidase XylA [Ortholog: Talaromyces stipitatus : B8M137]</i>                                                                |
| PDIG_07140 | PDIP_11790 | <i>Polysaccharide deacetylase (NodB), putative [Ortholog: Aspergillus clavatus : A1CB94]</i>                                           |
| PDIG_07330 | PDIP_11980 | <i>Hydrophobin [Ortholog: Aspergillus fumigatus : Q8J0V5]</i>                                                                          |
| PDIG_07340 | PDIP_11990 | <i>Putative uncharacterized protein [Ortholog: Aspergillus clavatus : A1CNA7]</i>                                                      |
| PDIG_07350 | PDIP_12000 | <i>Putative uncharacterized protein [Ortholog: Aspergillus clavatus : A1C541]</i>                                                      |
| PDIG_08100 | PDIP_36120 | <i>Cell surface spherulin 4-like protein, putative [Ortholog: Talaromyces stipitatus : B8MHZ7]</i>                                     |
| PDIG_08540 | PDIP_36560 | <i>Phospholipase C PLC-B [Ortholog: Aspergillus fumigatus : Q58I94]</i>                                                                |
| PDIG_08570 | PDIP_36590 | <i>Similar to putative uncharacterized protein Pc22g22680 [Blast hit trembl: Penicillium chrysogenum : B6HUP0]</i>                     |
| PDIG_08960 | PDIP_36990 | Putative protein                                                                                                                       |
| PDIG_09080 | PDIP_37110 | <i>Putative uncharacterized protein [Ortholog: Emericella nidulans : Q5AZ57]</i>                                                       |
| PDIG_09510 | PDIP_37540 | Putative uncharacterized protein [Ortholog: Phaeosphaeria nodorum : Q0UPS1]                                                            |
| PDIG_09890 | PDIP_39930 | <i>FAD binding domain protein [Ortholog: Aspergillus clavatus : A1CN67]</i>                                                            |
| PDIG_09940 | PDIP_39980 | <i>FAD binding domain protein [Ortholog: Aspergillus clavatus : A1CN64]</i>                                                            |
| PDIG_09970 | PDIP_40010 | <i>Trypsin-like serine protease, putative [Ortholog: Aspergillus clavatus : A1CN69]</i>                                                |
| PDIG_10120 | PDIP_40160 | <i>UPF0619 GPI-anchored membrane protein AFUA_3G00880 [Blast hit: Neosartorya fumigata: Q4WV6]</i>                                     |
| PDIG_10280 | PDIP_40320 | Putative protein                                                                                                                       |
| PDIG_10550 | PDIP_82060 | <i>Aspartic protease pep1 [Ortholog: Aspergillus fumigatus : P41748]</i>                                                               |
| PDIG_10750 | PDIP_82260 | <i>N-acetylglucosaminyl-phosphatidylinositol deacetylase, putative [Ortholog: Aspergillus fumigatus : Q4WVL6]</i>                      |
| PDIG_10860 | PDIP_82370 | <i>Alcohol dehydrogenase [Ortholog: Aspergillus fumigatus : Q4WGA6]</i>                                                                |
| PDIG_11100 | PDIP_82610 | <i>Protein kinase C substrate, putative [Ortholog: Aspergillus fumigatus : Q4WG82]</i>                                                 |
| PDIG_11270 | PDIP_82770 | <i>Acetylxylan esterase, putative [Ortholog: Talaromyces stipitatus : B8LWY3]</i>                                                      |
| PDIG_11300 | PDIP_82800 | <i>Predicted protein [Ortholog: Uncinocarpus reesii : C4K033]</i>                                                                      |
| PDIG_11370 | PDIP_82870 | <i>Predicted protein [Ortholog: Emericella nidulans : Q5BB87]</i>                                                                      |
| PDIG_11770 | PDIP_38000 | Putative protein                                                                                                                       |
| PDIG_12160 | PDIP_38380 | <i>Chitin deacetylase, putative [Ortholog: Aspergillus fumigatus : Q4WMC1]</i>                                                         |
| PDIG_12580 | PDIP_38800 | <i>Similar to Pc21g20300 protein [Blast hit trembl: Penicillium chrysogenum : B6HKM5]</i>                                              |
| PDIG_12980 | PDIP_39200 | <i>LysM domain protein, putative [Ortholog: Aspergillus fumigatus : A4D9P3]</i>                                                        |
| PDIG_13000 | PDIP_39220 | <i>Extracellular protein, putative [Ortholog: Aspergillus fumigatus : Q4WM72]</i>                                                      |
| PDIG_13350 | PDIP_40490 | <i>Putative uncharacterized protein [Ortholog: Aspergillus fumigatus : Q4WTE4]</i>                                                     |
| PDIG_13460 | PDIP_40590 | <i>GPI anchored protein, putative [Ortholog: Aspergillus fumigatus : Q4WTD8]</i>                                                       |
| PDIG_13580 | PDIP_47720 | <i>Extracellular endoglucanase, putative [Ortholog: Aspergillus fumigatus : Q4WE56]</i>                                                |
| PDIG_14130 | PDIP_39780 | <i>Putative uncharacterized protein [Ortholog: Emericella nidulans : Q5BFX1]</i>                                                       |
| PDIG_14140 | PDIP_39790 | <i>1,3-beta-glucanosyltransferase gel2 [Ortholog: Aspergillus fumigatus : P0C954]</i>                                                  |
| PDIG_14190 | PDIP_32120 | Putative protein                                                                                                                       |
| PDIG_14830 | PDIP_02280 | Putative protein                                                                                                                       |
| PDIG_15020 | PDIP_30540 | <i>1,3-beta-glucanosyltransferase Bgt1 [Ortholog: Aspergillus fumigatus : Q4WSV9]</i>                                                  |
| PDIG_15060 | PDIP_30590 | <i>Endosomal cargo receptor (P24), putative [Ortholog: Aspergillus fumigatus : Q4WSV8]</i>                                             |
| PDIG_15140 | PDIP_30660 | <i>Endopolyphosphatase [Ortholog: Emericella nidulans : Q5BE82]</i>                                                                    |
| PDIG_15240 | PDIP_30760 | <i>Putative uncharacterized protein [Ortholog: Aspergillus fumigatus : Q4WSV1]</i>                                                     |
| PDIG_15450 | PDIP_30990 | <i>Putative uncharacterized protein [Ortholog: Talaromyces stipitatus : B8M2N9]</i>                                                    |
| PDIG_15750 | PDIP_31320 | <i>Alpha-ketoglutarate-dependent 2,4-dichlorophenoxyacetate dioxygenase, putative [Blast hit trembl: Penicillium marneffe: B6QPT6]</i> |
| PDIG_15790 | PDIP_31360 | <i>GPI anchored protein, putative [Ortholog: Aspergillus fumigatus : Q4WT45]</i>                                                       |

|            |            |                                                                                                            |
|------------|------------|------------------------------------------------------------------------------------------------------------|
| PDIG_16290 | PDIP_87810 | Putative protein                                                                                           |
| PDIG_16510 | PDIP_88020 | Putative protein                                                                                           |
| PDIG_16630 | PDIP_88140 | <i>Glutaminyl cyclase, putative [Ortholog: Aspergillus fumigatus : Q4WP74]</i>                             |
| PDIG_16690 | PDIP_88200 | <i>Putative uncharacterized protein [Ortholog: Emericella nidulans : Q5B9E7]</i>                           |
| PDIG_16910 | -          | <i>Protein kinase domain protein [Ortholog: Aspergillus clavatus : A1CRU3]</i>                             |
| PDIG_16940 | -          | <i>Similar to Pc13g00960 protein [Blast hit trembl: Penicillium chrysogenum : B6H1A2]</i>                  |
| PDIG_16990 | -          | <i>Putative uncharacterized protein [Blast hit trembl: Neosartorya fumigata: Q4WWA4]</i>                   |
| PDIG_17090 | PDIP_55010 | Putative protein                                                                                           |
| PDIG_17180 | PDIP_55080 | <i>Aspergillopepsin, putative [Ortholog: Aspergillus fumigatus : Q4WAG2]</i>                               |
| PDIG_17220 | PDIP_55120 | Putative protein                                                                                           |
| PDIG_17590 | PDIP_55480 | <i>FAD dependent oxidoreductase, putative [Ortholog: Aspergillus fumigatus : Q4WAJ8]</i>                   |
| PDIG_18790 | PDIP_56620 | Putative protein                                                                                           |
| PDIG_18840 | PDIP_56670 | <i>NIMA-interacting protein TinC [Ortholog: Aspergillus fumigatus : Q4WAU9]</i>                            |
| PDIG_18940 | PDIP_88580 | <i>DOC family protein [Ortholog: Aspergillus fumigatus : Q4WC03]</i>                                       |
| PDIG_19060 | PDIP_01550 | <i>DnaJ and TPR domain protein [Ortholog: Aspergillus fumigatus : Q4WWD0]</i>                              |
| PDIG_19280 | PDIP_01330 | <i>60S ribosomal protein L20, putative [Ortholog: Aspergillus fumigatus : Q4WWD6]</i>                      |
| PDIG_19420 | PDIP_01190 | <i>Serum paraoxonase/arylesterase family protein [Ortholog: Aspergillus fumigatus : Q4WWG7]</i>            |
| PDIG_20200 | PDIP_00420 | <i>Putative uncharacterized protein [Ortholog: Aspergillus fumigatus : Q4WF34]</i>                         |
| PDIG_20470 | PDIP_00130 | <i>Putative uncharacterized protein [Ortholog: Aspergillus fumigatus : Q4WEZ6]</i>                         |
| PDIG_20490 | PDIP_00110 | <i>Putative uncharacterized protein [Ortholog: Emericella nidulans : Q5BA48]</i>                           |
| PDIG_20600 | PDIP_88430 | <i>Putative uncharacterized protein [Ortholog: Talaromyces stipitatus : B8MBM4]</i>                        |
| PDIG_20640 | PDIP_88450 | <i>Laccase TiiA [Ortholog: Aspergillus fumigatus : Q4WRN7]</i>                                             |
| PDIG_20830 | PDIP_23130 | <i>Putative uncharacterized protein [Ortholog: Uncinocarpus reesii : C4JI16]</i>                           |
| PDIG_21060 | PDIP_23340 | <i>1,3-beta-glucanosyltransferase, putative [Ortholog: Aspergillus fumigatus : Q4WYI9]</i>                 |
| PDIG_21170 | PDIP_23450 | <i>Aldose 1-epimerase, putative [Ortholog: Talaromyces stipitatus : B8M6K3]</i>                            |
| PDIG_21230 | PDIP_23510 | <i>Short-chain oxidoreductase, putative [Ortholog: Aspergillus fumigatus : Q4WS55]</i>                     |
| PDIG_21430 | PDIP_23710 | Putative protein                                                                                           |
| PDIG_21630 | PDIP_23910 | Putative protein                                                                                           |
| PDIG_21930 | PDIP_24210 | Putative protein                                                                                           |
| PDIG_21980 | PDIP_24260 | <i>Palmitoyl-protein thioesterase [Ortholog: Aspergillus fumigatus : Q4WYS3]</i>                           |
| PDIG_22070 | PDIP_24350 | <i>Rhamnogalacturonan acetyltransferase RgaE [Ortholog: Aspergillus fumigatus : Q4WYW6]</i>                |
| PDIG_22110 | PDIP_24390 | <i>Ketol-acid reductoisomerase [Ortholog: Aspergillus fumigatus : Q4WYW4]</i>                              |
| PDIG_22160 | PDIP_24440 | <i>Cytochrome c oxidase subunit 7A [Ortholog: Aspergillus fumigatus : Q4WYV9]</i>                          |
| PDIG_22450 | PDIP_14840 | <i>Cytochrome c oxidase assembly protein cox16, mitochondrial [Ortholog: Emericella nidulans : Q5AXJ9]</i> |
| PDIG_22480 | PDIP_14870 | <i>Putative uncharacterized protein [Ortholog: Emericella nidulans : Q5AXJ6]</i>                           |
| PDIG_22660 | PDIP_15060 | <i>Putative uncharacterized protein [Ortholog: Emericella nidulans : Q5AX74]</i>                           |
| PDIG_22770 | PDIP_15170 | <i>Predicted protein [Ortholog: Uncinocarpus reesii : C4JH88]</i>                                          |
| PDIG_22810 | PDIP_15210 | <i>Triacylglycerol lipase (LipA), putative [Ortholog: Aspergillus fumigatus : Q4W9R3]</i>                  |
| PDIG_22860 | PDIP_15260 | Putative protein                                                                                           |
| PDIG_22870 | PDIP_15270 | <i>C6 transcription factor Ctf1A, putative [Ortholog: Aspergillus fumigatus : Q4W9R8]</i>                  |
| PDIG_23080 | PDIP_15480 | <i>Aminopeptidase, putative [Ortholog: Talaromyces stipitatus : B8MDS6]</i>                                |
| PDIG_23270 | PDIP_15670 | <i>Alanine racemase family protein, putative [Ortholog: Talaromyces stipitatus : B8MDU2]</i>               |
| PDIG_23410 | PDIP_15820 | <i>Putative uncharacterized protein [Ortholog: Aspergillus fumigatus : Q4W9M2]</i>                         |
| PDIG_23520 | PDIP_15930 | <i>Putative uncharacterized protein [Ortholog: Emericella nidulans : Q5BG37]</i>                           |
| PDIG_23590 | PDIP_16000 | <i>Putative uncharacterized protein [Ortholog: Aspergillus clavatus : A1C990]</i>                          |
| PDIG_23650 | PDIP_16060 | <i>LysM domain protein [Ortholog: Aspergillus clavatus : A1CNR4]</i>                                       |
| PDIG_23770 | PDIP_16180 | Putative protein                                                                                           |
| PDIG_24340 | PDIP_58820 | <i>Alpha-1,2-mannosyltransferase, putative [Ortholog: Aspergillus fumigatus : Q4WVR9]</i>                  |
| PDIG_24430 | PDIP_58910 | <i>Putative uncharacterized protein [Ortholog: Magnaporthe grisea : A4RKV0]</i>                            |
| PDIG_24920 | PDIP_59400 | <i>Protein disulfide-isomerase tlgA [Ortholog: Aspergillus niger : Q00216]</i>                             |
| PDIG_25190 | PDIP_59680 | <i>Putative uncharacterized protein [Ortholog: Aspergillus fumigatus : Q4WVG3]</i>                         |
| PDIG_25220 | PDIP_59710 | <i>Putative uncharacterized protein [Ortholog: Emericella nidulans : Q5AYG6]</i>                           |

|            |            |                                                                                                                    |
|------------|------------|--------------------------------------------------------------------------------------------------------------------|
| PDIG_25230 | PDIP_59720 | <i>Putative uncharacterized protein [Ortholog: Aspergillus fumigatus : Q4WA44]</i>                                 |
| PDIG_25670 | PDIP_60150 | <i>Putative uncharacterized protein [Ortholog: Emericella nidulans : Q5BH49]</i>                                   |
| PDIG_25740 | PDIP_60220 | <i>Putative uncharacterized protein [Ortholog: Aspergillus fumigatus : Q4WDU6]</i>                                 |
| PDIG_26060 | -          | Putative protein                                                                                                   |
| PDIG_26280 | PDIP_60760 | Putative protein                                                                                                   |
| PDIG_26590 | PDIP_61040 | <i>Mannan endo-1,4-beta-mannosidase F [Blast hit: Aspergillus clavatus: A1C8U0]</i>                                |
| PDIG_26660 | PDIP_61110 | <i>Similar to Pc21g05400 protein [Blast hit trembl: Penicillium chrysogenum : B6HHI6]</i>                          |
| PDIG_26670 | PDIP_61120 | <i>Putative uncharacterized protein [Ortholog: Talaromyces stipitatus : B8MB19]</i>                                |
| PDIG_26830 | PDIP_61280 | Putative protein                                                                                                   |
| PDIG_26920 | PDIP_61370 | <i>Putative uncharacterized protein [Ortholog: Aspergillus fumigatus : Q4WCN9]</i>                                 |
| PDIG_27040 | PDIP_61480 | <i>Putative uncharacterized protein [Ortholog: Aspergillus fumigatus : Q4WCQ0]</i>                                 |
| PDIG_27310 | PDIP_61750 | Putative protein                                                                                                   |
| PDIG_27590 | PDIP_62030 | <i>Thioesterase family protein [Ortholog: Aspergillus fumigatus : Q4WCT8]</i>                                      |
| PDIG_27790 | PDIP_62230 | <i>Putative uncharacterized protein [Ortholog: Talaromyces stipitatus : B8M3V3]</i>                                |
| PDIG_28020 | PDIP_62460 | <i>Uncharacterized protein AFUA_6G02800 [Ortholog: Aspergillus fumigatus : Q4WCX9]</i>                             |
| PDIG_28050 | PDIP_62490 | <i>Putative uncharacterized protein [Ortholog: Aspergillus fumigatus : Q4WCZ3]</i>                                 |
| PDIG_28100 | PDIP_62540 | <i>Exopolysaccharuronase X [Ortholog: Aspergillus niger : Q27UB3]</i>                                              |
| PDIG_28110 | PDIP_62550 | <i>Putative uncharacterized protein [Ortholog: Emericella nidulans : Q5AU12]</i>                                   |
| PDIG_28250 | PDIP_62690 | Putative protein                                                                                                   |
| PDIG_28520 | PDIP_62960 | <i>Putative uncharacterized protein [Ortholog: Uncinocarpus reesii : C4JL79]</i>                                   |
| PDIG_28590 | PDIP_63030 | <i>SCP-like extracellular protein, putative [Ortholog: Aspergillus clavatus : A1CPM7]</i>                          |
| PDIG_28610 | PDIP_63050 | <i>Cytochrome C1/Cyt1, putative [Ortholog: Aspergillus fumigatus : Q4WKL3]</i>                                     |
| PDIG_28800 | PDIP_63240 | <i>Similar to putative uncharacterized protein Pc22g21980 [Blast hit trembl: Penicillium chrysogenum : B6HTC4]</i> |
| PDIG_29240 | PDIP_63670 | <i>ADP-ribosylation factor, putative [Ortholog: Talaromyces stipitatus : B8M8M7]</i>                               |
| PDIG_29880 | PDIP_64260 | <i>Iron-sulfur cluster assembly accessory protein Isa2, putative [Ortholog: Aspergillus fumigatus : Q4X1D3]</i>    |
| PDIG_30080 | PDIP_64460 | <i>Polygalacturonase [Blast hit: Penicillium digitatum: Q9Y718]</i>                                                |
| PDIG_30110 | PDIP_64490 | <i>60S acidic ribosomal protein P2 [Ortholog: Aspergillus fumigatus : Q9UUZ6]</i>                                  |
| PDIG_30150 | PDIP_64530 | <i>Adhesin, putative [Ortholog: Aspergillus fumigatus : Q4X1F7]</i>                                                |
| PDIG_30200 | PDIP_64580 | Putative protein                                                                                                   |
| PDIG_30630 | PDIP_65010 | <i>Predicted protein [Ortholog: Pyrenophora tritici-repentis : B2W519]</i>                                         |
| PDIG_30650 | PDIP_65030 | <i>GPI anchored cell wall protein, putative [Ortholog: Aspergillus fumigatus : Q4WFZ4]</i>                         |
| PDIG_30830 | PDIP_65210 | <i>Extracellular endoglucanase/cellulase, putative [Ortholog: Aspergillus fumigatus : Q4X1L7]</i>                  |
| PDIG_30900 | PDIP_50480 | <i>Similar to Pc21g17890 protein [Blast hit trembl: Penicillium chrysogenum : B6HND1]</i>                          |
| PDIG_30940 | PDIP_50520 | <i>Similar to Pc21g17930 protein [Blast hit trembl: Penicillium chrysogenum : B6HND5]</i>                          |
| PDIG_30990 | PDIP_50570 | <i>Putative uncharacterized protein [Ortholog: Aspergillus fumigatus : Q4WU10]</i>                                 |
| PDIG_31210 | PDIP_50790 | <i>DUF636 domain protein [Ortholog: Aspergillus fumigatus : Q4WU46]</i>                                            |
| PDIG_31290 | PDIP_50870 | <i>Hydrophobin, putative [Ortholog: Aspergillus fumigatus : Q4WBR8]</i>                                            |
| PDIG_31390 | PDIP_50970 | <i>Similar to putative uncharacterized protein Pc21g18510 [Blast hit trembl: Penicillium chrysogenum : B6HHS1]</i> |
| PDIG_31520 | PDIP_51100 | Putative protein                                                                                                   |
| PDIG_31780 | PDIP_51360 | <i>Putative uncharacterized protein [Ortholog: Emericella nidulans : Q5B445]</i>                                   |
| PDIG_31920 | PDIP_51500 | <i>Putative uncharacterized protein [Ortholog: Aspergillus fumigatus : Q4WUK7]</i>                                 |
| PDIG_32120 | PDIP_51700 | <i>Alpha-1,6-mannosyltransferase subunit (Och1), putative [Ortholog: Aspergillus fumigatus : Q4WU15]</i>           |
| PDIG_32140 | PDIP_51720 | <i>FAD/FMN-containing isoamyl alcohol oxidase MreA [Ortholog: Aspergillus fumigatus : Q4WD61]</i>                  |
| PDIG_32420 | PDIP_52010 | Putative protein                                                                                                   |
| PDIG_32570 | PDIP_52140 | <i>Similar to Pc22g16030 protein [Blast hit trembl: Penicillium chrysogenum : B6HQP8]</i>                          |
| PDIG_32690 | PDIP_52260 | <i>Expansin-like protein 1 [Blast hit: Dictyostelium discoideum: Q55G31]</i>                                       |
| PDIG_33000 | PDIP_52560 | <i>Putative uncharacterized protein [Ortholog: Aspergillus fumigatus : Q4WUA1]</i>                                 |
| PDIG_33090 | PDIP_52650 | <i>Probable beta-glucosidase G [Ortholog: Emericella nidulans : Q5B0F4]</i>                                        |
| PDIG_33300 | PDIP_52880 | <i>Putative uncharacterized protein [Ortholog: Aspergillus fumigatus : Q4WU78]</i>                                 |
| PDIG_33420 | PDIP_53000 | <i>Similar to Pc22g14870 protein [Blast hit trembl: Penicillium chrysogenum : B6HVC3]</i>                          |
| PDIG_33560 | PDIP_53150 | <i>Beta-glucosidase, putative [Ortholog: Aspergillus fumigatus : Q4WU38]</i>                                       |
| PDIG_33750 | PDIP_53330 | <i>Extracellular serine-threonine rich protein [Ortholog: Aspergillus fumigatus : Q4WY10]</i>                      |

|            |            |                                                                                                                        |
|------------|------------|------------------------------------------------------------------------------------------------------------------------|
| PDIG_33760 | PDIP_53340 | <i>Hydrophobin, putative [Ortholog: Aspergillus fumigatus : Q4WBR8]</i>                                                |
| PDIG_33980 | PDIP_53560 | <i>Long chronological lifespan protein 2 [Ortholog: Aspergillus fumigatus : Q4WES5]</i>                                |
| PDIG_34000 | PDIP_53580 | <i>Putative uncharacterized protein [Ortholog: Emericella nidulans : Q5AWG1]</i>                                       |
| PDIG_34120 | PDIP_53700 | <i>Putative transcriptional activator [Ortholog: Emericella nidulans : Q8X1W4]</i>                                     |
| PDIG_34290 | PDIP_53850 | Putative protein                                                                                                       |
| PDIG_34320 | PDIP_53880 | <i>Putative uncharacterized protein [Ortholog: Emericella nidulans : Q5B0I6]</i>                                       |
| PDIG_34340 | PDIP_53900 | <i>Endochitinase 2 [Blast hit: Coccidioides posadasii: P54197]</i>                                                     |
| PDIG_34360 | PDIP_53920 | <i>Putative uncharacterized protein [Ortholog: Aspergillus fumigatus : Q4W9T1]</i>                                     |
| PDIG_34550 | PDIP_54110 | Putative protein                                                                                                       |
| PDIG_34560 | PDIP_54130 | <i>Beta-1,6-glucanase Neg1, putative [Ortholog: Aspergillus fumigatus : Q4WBR2]</i>                                    |
| PDIG_34840 | PDIP_54410 | <i>Putative uncharacterized protein [Ortholog: Aspergillus clavatus : A1CG66]</i>                                      |
| PDIG_34910 | PDIP_54470 | <i>Nuclease PA3, putative [Ortholog: Talaromyces stipitatus : B8MCF5]</i>                                              |
| PDIG_34980 | PDIP_54540 | <i>SUN domain protein (Uth1), putative [Ortholog: Aspergillus fumigatus : Q4WGL5]</i>                                  |
| PDIG_36010 | PDIP_05470 | <i>Similar to Pc06g00720 protein [Blast hit trembl: Penicillium chrysogenum : B6GW15]</i>                              |
| PDIG_36020 | PDIP_05460 | <i>Hsp70 family chaperone Lhs1/Orp150, putative [Ortholog: Aspergillus fumigatus : Q4WRU6]</i>                         |
| PDIG_36090 | PDIP_05390 | Putative uncharacterized protein [Ortholog: Phaeosphaeria nodorum : Q0UK59]                                            |
| PDIG_36170 | PDIP_05310 | <i>Ribonuclease T2, putative [Ortholog: Aspergillus fumigatus : Q4WRE3]</i>                                            |
| PDIG_36190 | PDIP_05290 | Putative protein                                                                                                       |
| PDIG_36250 | PDIP_05230 | <i>Similar to Pc09g00020 protein [Blast hit trembl: Penicillium chrysogenum : B6GWJ9]</i>                              |
| PDIG_36260 | PDIP_05220 | Putative protein                                                                                                       |
| PDIG_36270 | PDIP_05210 | <i>Aspergillopepsin, putative [Ortholog: Talaromyces stipitatus : B8M952]</i>                                          |
| PDIG_36290 | -          | <i>Putative uncharacterized protein [Blast hit trembl: Neosartorya fumigata: Q4WBZ1]</i>                               |
| PDIG_36510 | PDIP_83110 | Putative protein                                                                                                       |
| PDIG_36540 | PDIP_83140 | <i>Purine nucleoside permease, putative [Ortholog: Aspergillus fumigatus : Q4WIS5]</i>                                 |
| PDIG_36550 | PDIP_83150 | <i>Extracellular GDSL-like lipase/acylhydrolase, putative [Ortholog: Aspergillus fumigatus : Q4WIS4]</i>               |
| PDIG_36700 | PDIP_83290 | Putative protein                                                                                                       |
| PDIG_36940 | PDIP_83530 | <i>Similar to Pc22g25340 protein [Blast hit trembl: Penicillium chrysogenum : B6HS54]</i>                              |
| PDIG_37020 | PDIP_83610 | <i>Similar to putative uncharacterized protein Pc22g25460 [Blast hit trembl: Penicillium chrysogenum : B6HSI4]</i>     |
| PDIG_37060 | PDIP_83650 | Putative protein                                                                                                       |
| PDIG_37220 | PDIP_83810 | <i>Putative uncharacterized protein [Ortholog: Aspergillus clavatus : A1CDP2]</i>                                      |
| PDIG_37480 | PDIP_84070 | <i>PDI related protein A [Ortholog: Aspergillus niger : O93914]</i>                                                    |
| PDIG_37500 | PDIP_84090 | <i>Capsular associated protein, putative [Ortholog: Aspergillus fumigatus : Q4WJP1]</i>                                |
| PDIG_37510 | PDIP_84100 | <i>Endo-1,3(4)-beta-glucanase, putative [Ortholog: Aspergillus fumigatus : Q4WJP2]</i>                                 |
| PDIG_37540 | PDIP_84130 | <i>Putative uncharacterized protein [Ortholog: Aspergillus fumigatus : Q4WJP4]</i>                                     |
| PDIG_37820 | PDIP_84410 | <i>Mitochondrial inner membrane nuclease Nuc1, putative [Ortholog: Aspergillus fumigatus : Q4X1U4]</i>                 |
| PDIG_37880 | PDIP_84460 | <i>Trafficking protein particle complex subunit 2/Sedlin, putative [Ortholog: Aspergillus fumigatus : Q4X1U7]</i>      |
| PDIG_38140 | PDIP_84720 | <i>Carboxylesterase, putative [Ortholog: Aspergillus fumigatus : Q4X1W9]</i>                                           |
| PDIG_38220 | PDIP_84850 | <i>Putative uncharacterized protein [Ortholog: Emericella nidulans : Q5B836]</i>                                       |
| PDIG_38490 | PDIP_85130 | <i>DnaJ domain protein, putative [Ortholog: Aspergillus fumigatus : Q4X1Y9]</i>                                        |
| PDIG_38650 | PDIP_85290 | Putative protein                                                                                                       |
| PDIG_38900 | PDIP_85520 | Putative protein                                                                                                       |
| PDIG_38960 | -          | <i>Similar to Pc13g05030 protein [Blast hit trembl: Penicillium chrysogenum : B6H2E3]</i>                              |
| PDIG_39000 | PDIP_46920 | <i>Endonuclease/exonuclease/phosphatase family [Ortholog: Coccidioides posadasii/Verticillium albo-atrum : C9SNJ1]</i> |
| PDIG_39120 | PDIP_24690 | <i>Cytochrome P450 alkane hydroxylase, putative [Ortholog: Aspergillus fumigatus : Q4WMMW7]</i>                        |
| PDIG_39160 | PDIP_24730 | <i>Putative uncharacterized protein [Ortholog: Emericella nidulans : Q5B6A8]</i>                                       |
| PDIG_39260 | PDIP_24830 | <i>Potential peptidyl-tRNA hydrolase [Ortholog: Uncinocarpus reesii : C4JRQ7]</i>                                      |
| PDIG_39410 | PDIP_24960 | <i>Oxidoreductase, short-chain dehydrogenase/reductase family [Ortholog: Aspergillus fumigatus : Q4WK7T]</i>           |
| PDIG_39740 | PDIP_25280 | <i>Predicted protein [Ortholog: Emericella nidulans : Q5B220]</i>                                                      |
| PDIG_40020 | PDIP_25550 | <i>Putative uncharacterized protein [Ortholog: Emericella nidulans : Q5BC75]</i>                                       |
| PDIG_40580 | PDIP_26130 | <i>Putative uncharacterized protein [Ortholog: Aspergillus fumigatus : Q4WEV0]</i>                                     |
| PDIG_40780 | PDIP_85700 | <i>Putative uncharacterized protein [Ortholog: Emericella nidulans : Q5B717]</i>                                       |
| PDIG_41280 | PDIP_86200 | <i>Putative uncharacterized protein [Blast hit trembl: Aspergillus niger: A2QSS8]</i>                                  |

|            |            |                                                                                                         |
|------------|------------|---------------------------------------------------------------------------------------------------------|
| PDIG_41310 | PDIP_86230 | Similar to Pc21g03770 protein [Blast hit trembl: <i>Penicillium chrysogenum</i> : B6HLI7]               |
| PDIG_41570 | PDIP_06490 | Putative uncharacterized protein [Blast hit trembl: <i>Schizosaccharomyces japonicus</i> : B6JUW3]      |
| PDIG_41710 | PDIP_06350 | Similar to Pc16g05180 protein [Blast hit trembl: <i>Penicillium chrysogenum</i> : B6H9H2]               |
| PDIG_42020 | PDIP_06030 | Putative protein                                                                                        |
| PDIG_42030 | PDIP_06020 | Aspergillopepsin, putative [Ortholog: <i>Aspergillus fumigatus</i> : Q4WF96]                            |
| PDIG_42070 | PDIP_40690 | Putative uncharacterized protein [Ortholog: <i>Emericella nidulans</i> : Q5AQW3]                        |
| PDIG_42110 | PDIP_40730 | Fungal specific transcription factor, putative [Ortholog: <i>Aspergillus fumigatus</i> : Q4WZN6]        |
| PDIG_42380 | PDIP_40960 | Putative uncharacterized protein [Ortholog: <i>Emericella nidulans</i> : Q5BF41]                        |
| PDIG_42400 | PDIP_40980 | GPI anchored serine-threonine rich protein [Ortholog: <i>Aspergillus fumigatus</i> : Q4WTF2]            |
| PDIG_42450 | PDIP_41030 | Putative uncharacterized protein [Ortholog: <i>Aspergillus fumigatus</i> : Q4WBI9]                      |
| PDIG_42710 | PDIP_41290 | Transmembrane glycoprotein, putative [Ortholog: <i>Aspergillus fumigatus</i> : Q4WTH6]                  |
| PDIG_43180 | PDIP_34400 | Extracellular metalloprotease AFUA_1G07730 [Ortholog: <i>Aspergillus fumigatus</i> : Q4WJ01]            |
| PDIG_43440 | PDIP_34670 | Putative uncharacterized protein [Ortholog: <i>Aspergillus fumigatus</i> : Q4WJ24]                      |
| PDIG_43880 | PDIP_35110 | Putative protein                                                                                        |
| PDIG_44220 | PDIP_35450 | Endo alpha-1,4 polygalactosaminidase, putative [Ortholog: <i>Talaromyces stipitatus</i> : B8MMA0]       |
| PDIG_44250 | PDIP_35480 | Fungal chitosanase, putative [Ortholog: <i>Aspergillus clavatus</i> : A1CBX0]                           |
| PDIG_44760 | PDIP_16750 | Similar to Pc20g13710 protein [Blast hit trembl: <i>Penicillium chrysogenum</i> : B6HH08]               |
| PDIG_44860 | PDIP_16850 | IgE binding protein, putative [Ortholog: <i>Aspergillus fumigatus</i> : Q4WKM2]                         |
| PDIG_44930 | PDIP_16910 | Putative uncharacterized protein [Ortholog: <i>Magnaporthe grisea</i> : A4R6V7]                         |
| PDIG_44990 | PDIP_16950 | Isoamyl alcohol oxidase, putative [Ortholog: <i>Aspergillus fumigatus</i> : A4D9R5]                     |
| PDIG_45060 | PDIP_17000 | Putative protein                                                                                        |
| PDIG_45070 | PDIP_17010 | Polygalacturonase-2 [Ortholog: <i>Coccidioides posadasii</i> / <i>Verticillium albo-atrum</i> : C9SU11] |
| PDIG_45920 | PDIP_17850 | Alpha-1,2-mannosyltransferase (Mnn2), putative [Ortholog: <i>Aspergillus fumigatus</i> : Q4WDE3]        |
| PDIG_45940 | PDIP_17870 | Predicted protein [Ortholog: <i>Ucinocarpus reesii</i> : C4JFW2]                                        |
| PDIG_45990 | PDIP_17920 | Putative uncharacterized protein [Ortholog: <i>Aspergillus fumigatus</i> : Q4W8Z4]                      |
| PDIG_46210 | PDIP_18140 | Putative uncharacterized protein [Ortholog: <i>Aspergillus fumigatus</i> : Q4WDG7]                      |
| PDIG_46430 | PDIP_18350 | Putative protein                                                                                        |
| PDIG_47070 | PDIP_19000 | Putative protein                                                                                        |
| PDIG_47260 | PDIP_16440 | Ergosterol biosynthesis protein Erg28, putative [Ortholog: <i>Aspergillus fumigatus</i> : Q4X116]       |
| PDIG_47500 | PDIP_56880 | Protein disulfide isomerase [Ortholog: <i>Aspergillus niger</i> : Q5U9X2]                               |
| PDIG_47590 | PDIP_56970 | Putative uncharacterized protein [Ortholog: <i>Emericella nidulans</i> : Q5BDF8]                        |
| PDIG_47620 | PDIP_57000 | Triacylglycerol lipase, putative [Ortholog: <i>Aspergillus fumigatus</i> : Q4WCJ4]                      |
| PDIG_47640 | PDIP_57020 | Putative uncharacterized protein [Ortholog: <i>Aspergillus fumigatus</i> : Q4WCJ2]                      |
| PDIG_47670 | PDIP_57050 | Translocation protein (Sec66), putative [Ortholog: <i>Aspergillus fumigatus</i> : Q4WC19]               |
| PDIG_47800 | PDIP_57180 | Putative protein                                                                                        |
| PDIG_47890 | -          | Putative protein                                                                                        |
| PDIG_47980 | PDIP_57360 | ABC-type Fe3+ transport system [Ortholog: <i>Pyrenophora tritici-repentis</i> : B2W446]                 |
| PDIG_48090 | PDIP_57470 | Alpha-1,2-mannosyltransferase (Kre2), putative [Ortholog: <i>Aspergillus fumigatus</i> : Q4WV44]        |
| PDIG_48170 | PDIP_57550 | Putative uncharacterized protein [Ortholog: <i>Emericella nidulans</i> : Q5B7B1]                        |
| PDIG_48400 | PDIP_57780 | Amidase family protein [Ortholog: <i>Talaromyces stipitatus</i> : B8MAL2]                               |
| PDIG_48410 | PDIP_57790 | Pectin lyase, putative [Ortholog: <i>Aspergillus clavatus</i> : A1CAZ3]                                 |
| PDIG_48420 | PDIP_57800 | Sexual development protein (LsdA), putative [Ortholog: <i>Aspergillus fumigatus</i> : Q4WV12]           |
| PDIG_48480 | PDIP_57850 | Putative uncharacterized protein [Ortholog: <i>Pyrenophora tritici-repentis</i> : B2WMN7]               |
| PDIG_48640 | PDIP_58020 | Glycosyl hydrolase, putative [Ortholog: <i>Aspergillus fumigatus</i> : Q4WIT8]                          |
| PDIG_48720 | PDIP_58100 | Alpha-1,2-mannosidase, putative [Ortholog: <i>Aspergillus fumigatus</i> : Q4WGE1]                       |
| PDIG_48730 | PDIP_58110 | FAD dependent sulfhydryl oxidase Erv2, putative [Ortholog: <i>Aspergillus fumigatus</i> : Q4WGD8]       |
| PDIG_48980 | PDIP_58360 | Putative protein                                                                                        |
| PDIG_49410 | PDIP_42280 | O-methyltransferase, putative [Ortholog: <i>Aspergillus fumigatus</i> : Q4WQW4]                         |
| PDIG_49540 | PDIP_42400 | Putative protein                                                                                        |
| PDIG_49550 | PDIP_42410 | Predicted protein [Ortholog: <i>Aspergillus clavatus</i> : A1C8F5]                                      |
| PDIG_49580 | PDIP_42440 | Lipase, putative [Ortholog: <i>Aspergillus fumigatus</i> : Q4WGG4]                                      |
| PDIG_49610 | PDIP_42470 | Extracellular lipase, putative [Ortholog: <i>Aspergillus fumigatus</i> : Q4WBJ7]                        |

|            |            |                                                                                                                    |
|------------|------------|--------------------------------------------------------------------------------------------------------------------|
| PDIG_49640 | PDIP_42500 | <i>Putative uncharacterized protein [Ortholog: Emericella nidulans : Q5AS26]</i>                                   |
| PDIG_49660 | PDIP_42520 | Putative protein                                                                                                   |
| PDIG_49750 | PDIP_42610 | Putative protein                                                                                                   |
| PDIG_49830 | PDIP_42690 | <i>EPD1 [Ortholog: Uncinocarpus reesii : C4JSL9]</i>                                                               |
| PDIG_49910 | PDIP_19140 | Putative protein                                                                                                   |
| PDIG_50040 | PDIP_19280 | <i>Putative uncharacterized protein [Ortholog: Talaromyces stipitatus : B8MJY1]</i>                                |
| PDIG_50070 | PDIP_19310 | Putative protein                                                                                                   |
| PDIG_50080 | PDIP_19320 | <i>Allergen Asp f 4 [Blast hit: Neosartorya fumigata: O60024]</i>                                                  |
| PDIG_50090 | PDIP_19330 | Putative protein                                                                                                   |
| PDIG_50230 | PDIP_19470 | Putative protein                                                                                                   |
| PDIG_50340 | PDIP_19580 | <i>Rhamnogalacturonase, putative [Ortholog: Talaromyces stipitatus : B8M540]</i>                                   |
| PDIG_50670 | PDIP_19910 | Endopolygalacturonase 1 [Ortholog: Botrytis fuckeliana : Q4G496]                                                   |
| PDIG_50750 | PDIP_19970 | Putative protein                                                                                                   |
| PDIG_51160 | PDIP_20380 | <i>Putative uncharacterized protein [Ortholog: Aspergillus fumigatus : Q4WHI9]</i>                                 |
| PDIG_51550 | PDIP_20750 | Putative protein                                                                                                   |
| PDIG_51800 | PDIP_21000 | Putative protein                                                                                                   |
| PDIG_51850 | PDIP_21050 | Putative protein                                                                                                   |
| PDIG_52680 | -          | Putative protein                                                                                                   |
| PDIG_52750 | PDIP_47970 | <i>Metallo-beta-lactamase superfamily protein [Ortholog: Aspergillus clavatus : A1C597]</i>                        |
| PDIG_53310 | PDIP_48530 | <i>Similar to Pc21g15430 protein [Blast hit trembl: Penicillium chrysogenum : B6HJU1]</i>                          |
| PDIG_53520 | PDIP_48740 | <i>Class III chitinase, putative [Ortholog: Aspergillus fumigatus : Q4WEM4]</i>                                    |
| PDIG_53840 | PDIP_49060 | <i>Putative uncharacterized protein [Ortholog: Aspergillus fumigatus : Q4WEK3]</i>                                 |
| PDIG_53870 | PDIP_49090 | <i>Putative uncharacterized protein [Ortholog: Aspergillus clavatus : A1C510]</i>                                  |
| PDIG_53930 | PDIP_49150 | <i>Microsomal signal peptidase subunit (Gp23), putative [Ortholog: Aspergillus fumigatus : Q4WEJ4]</i>             |
| PDIG_54070 | PDIP_49290 | <i>Conidial pigment biosynthesis oxidase Abr1/brown 1 [Ortholog: Aspergillus fumigatus : Q4WZB4]</i>               |
| PDIG_54160 | PDIP_49380 | <i>Putative uncharacterized protein [Ortholog: Aspergillus fumigatus : Q4WEH3]</i>                                 |
| PDIG_54480 | PDIP_49700 | <i>Vacuolar serine protease [Ortholog: Penicillium chrysogenum : Q9HF04]</i>                                       |
| PDIG_54540 | PDIP_49760 | Putative protein                                                                                                   |
| PDIG_54550 | -          | <i>Similar to Pc21g10540 protein [Blast hit trembl: Penicillium chrysogenum : B6HIY9]</i>                          |
| PDIG_54560 | PDIP_49770 | Putative protein                                                                                                   |
| PDIG_54580 | PDIP_49790 | Putative protein                                                                                                   |
| PDIG_54760 | PDIP_49970 | <i>Sad1/UNC domain protein [Ortholog: Aspergillus fumigatus : Q4WTX9]</i>                                          |
| PDIG_54960 | -          | <i>Antigenic thaumatin domain protein, putative [Ortholog: Aspergillus fumigatus : Q4WBB5]</i>                     |
| PDIG_54970 | PDIP_50180 | <i>Triglyceride lipase-cholesterol esterase, putative [Ortholog: Aspergillus fumigatus : Q4WUM3]</i>               |
| PDIG_55000 | PDIP_50210 | <i>NADH-ubiquinone oxidoreductase 9.5 kDa subunit, putative [Ortholog: Aspergillus fumigatus : Q4WUM5]</i>         |
| PDIG_55140 | PDIP_50350 | <i>Putative uncharacterized protein [Ortholog: Talaromyces stipitatus : B8MD53]</i>                                |
| PDIG_55370 | PDIP_14580 | <i>C6 finger domain protein, putative [Ortholog: Talaromyces stipitatus : B8MDH5]</i>                              |
| PDIG_55980 | -          | <i>Similar to Pc16g14670 protein [Blast hit trembl: Penicillium chrysogenum : B6HA13]</i>                          |
| PDIG_56000 | PDIP_65550 | <i>Putative uncharacterized protein [Ortholog: Aspergillus clavatus : A1C5M6]</i>                                  |
| PDIG_56270 | PDIP_65830 | Putative protein                                                                                                   |
| PDIG_56350 | PDIP_65910 | <i>Putative uncharacterized protein [Ortholog: Aspergillus fumigatus : A4D9Z1]</i>                                 |
| PDIG_56590 | PDIP_66150 | <i>Similar to putative uncharacterized protein Pc16g13760 [Blast hit trembl: Penicillium chrysogenum : B6HAR7]</i> |
| PDIG_56860 | PDIP_66420 | <i>Mannosyl-oligosaccharide 1,2-alpha-mannosidase [Ortholog: Uncinocarpus reesii : C4JY92]</i>                     |
| PDIG_56880 | PDIP_66440 | Putative protein                                                                                                   |
| PDIG_57060 | PDIP_66600 | <i>Exo-1,3-beta-D-glucanase, putative [Ortholog: Aspergillus fumigatus : Q6MY43]</i>                               |
| PDIG_57120 | PDIP_66660 | <i>Possible secreted cellulose-binding protein [Ortholog: Aspergillus fumigatus : Q6MY45]</i>                      |
| PDIG_57130 | PDIP_66670 | Putative protein                                                                                                   |
| PDIG_57310 | PDIP_66850 | <i>Conserved fungal protein [Ortholog: Aspergillus fumigatus : Q4WS27]</i>                                         |
| PDIG_57580 | PDIP_67090 | <i>Transcription factor spt3, putative [Ortholog: Aspergillus fumigatus : Q6MY90]</i>                              |
| PDIG_57670 | PDIP_67180 | <i>SUN family protein, putative [Ortholog: Aspergillus fumigatus : Q6MYA0]</i>                                     |
| PDIG_57680 | PDIP_67190 | <i>Leucine carboxyl methyltransferase superfamily [Ortholog: Talaromyces stipitatus : B8M0T0]</i>                  |
| PDIG_57940 | PDIP_67440 | <i>Allergen, putative [Ortholog: Aspergillus fumigatus : Q4WF99]</i>                                               |



|            |            |                                                                                                                    |
|------------|------------|--------------------------------------------------------------------------------------------------------------------|
| PDIG_57950 | PDIP_67450 | <i>Putative uncharacterized protein [Ortholog: Magnaporthe grisea : A4QW16]</i>                                    |
| PDIG_57980 | PDIP_46070 | Putative protein                                                                                                   |
| PDIG_58090 | PDIP_67580 | <i>Catalase B [Ortholog: Emericella nidulans : P78619]</i>                                                         |
| PDIG_58170 | PDIP_67660 | <i>Cytochrome P450 alkane hydroxylase, putative [Ortholog: Aspergillus fumigatus : Q4W9T4]</i>                     |
| PDIG_58200 | PDIP_67690 | Putative uncharacterized protein [Ortholog: Phaeosphaeria nodorum : Q0UQL8]                                        |
| PDIG_58250 | PDIP_67740 | <i>Similar to Pc14g00510 protein [Blast hit trembl: Penicillium chrysogenum : B6H5N4]</i>                          |
| PDIG_58390 | -          | <i>Uncharacterized protein YHR202W [Blast hit: Saccharomyces cerevisiae: P38887]</i>                               |
| PDIG_58650 | PDIP_68130 | <i>Pheromone [Ortholog: Penicillium chrysogenum : B1GVB6]</i>                                                      |
| PDIG_58830 | PDIP_68290 | <i>Extracellular triacylglycerol lipase, putative [Ortholog: Aspergillus fumigatus : Q4WNF9]</i>                   |
| PDIG_59000 | PDIP_68450 | <i>Beta-galactosidase, putative [Ortholog: Talaromyces stipitatus : B8MKF6]</i>                                    |
| PDIG_59010 | -          | <i>Ankyrin repeat domain protein, putative [Ortholog: Talaromyces stipitatus : B8M9T6]</i>                         |
| PDIG_59070 | PDIP_68510 | <i>Similar to Pc14g01640 protein [Blast hit trembl: Penicillium chrysogenum : B6H5Z2]</i>                          |
| PDIG_59180 | PDIP_68620 | <i>Peptidase, putative [Ortholog: Aspergillus fumigatus : Q4WNC9]</i>                                              |
| PDIG_59450 | PDIP_68890 | <i>Arabinogalactan endo-1,4-beta-galactosidase GalA [Ortholog: Talaromyces stipitatus : B8MTD9]</i>                |
| PDIG_59490 | PDIP_68930 | <i>60S acidic ribosomal protein P1 [Ortholog: Aspergillus fumigatus : Q9HGV0]</i>                                  |
| PDIG_59520 | PDIP_68960 | <i>Protein phosphatase 2C family protein [Ortholog: Aspergillus fumigatus : Q4WJ85]</i>                            |
| PDIG_59540 | PDIP_68980 | <i>Alpha-1,2-mannosyltransferase (Alg11), putative [Ortholog: Aspergillus fumigatus : Q4WJ82]</i>                  |
| PDIG_59770 | PDIP_69190 | <i>Similar to Pc13g02730 protein [Blast hit trembl: Penicillium chrysogenum : B6H1E0]</i>                          |
| PDIG_59950 | PDIP_69370 | <i>Similar to Pc13g02530 protein [Blast hit trembl: Penicillium chrysogenum : B6H1K5]</i>                          |
| PDIG_60120 | -          | <i>Similar to Pc13g02350 protein [Blast hit trembl: Penicillium chrysogenum : B6H1H7]</i>                          |
| PDIG_60290 | PDIP_69700 | Putative protein                                                                                                   |
| PDIG_60350 | PDIP_69760 | Putative protein                                                                                                   |
| PDIG_60430 | PDIP_69840 | <i>Alpha-L-rhamnosidase B, putative [Ortholog: Aspergillus fumigatus : Q4WJF8]</i>                                 |
| PDIG_60440 | PDIP_69850 | <i>Extracellular exo-polygalacturonase, putative [Ortholog: Aspergillus fumigatus : Q4WJF7]</i>                    |
| PDIG_61070 | PDIP_70500 | <i>Cellulose-binding GDSL lipase/acylhydrolase, putative [Ortholog: Talaromyces stipitatus : B8M2U4]</i>           |
| PDIG_61080 | PDIP_70510 | <i>Endo-beta-1,4-glucanase B [Ortholog: Aspergillus niger : O74706]</i>                                            |
| PDIG_61150 | PDIP_70580 | <i>Putative uncharacterized protein [Ortholog: Coccidioides posadasii/Verticillium albo-atrum : C9SF83]</i>        |
| PDIG_61260 | PDIP_70690 | Putative protein                                                                                                   |
| PDIG_61570 | PDIP_71000 | <i>Exoglucanase type C [Ortholog: Gibberella zeae : Q6XZE4]</i>                                                    |
| PDIG_61630 | PDIP_71060 | <i>Mitochondrial import inner membrane translocase subunit tim14 [Ortholog: Emericella nidulans : Q5B4H1]</i>      |
| PDIG_61740 | PDIP_71150 | <i>Putative uncharacterized protein [Ortholog: Emericella nidulans : Q5B6L2]</i>                                   |
| PDIG_61880 | PDIP_71270 | <i>Allergen Asp f 4 [Blast hit: Neosartorya fumigata: O60024]</i>                                                  |
| PDIG_61930 | PDIP_71320 | <i>FKBP-type peptidyl-prolyl isomerase, putative [Ortholog: Aspergillus clavatus : A1CES3]</i>                     |
| PDIG_61940 | PDIP_71330 | <i>Heme/steroid binding protein, putative [Ortholog: Aspergillus fumigatus : Q4WHX3]</i>                           |
| PDIG_62200 | PDIP_71590 | <i>Carboxypeptidase 5 [Ortholog: Aspergillus fumigatus : Q5VJG7]</i>                                               |
| PDIG_62260 | PDIP_71640 | <i>Antigen 1 [Ortholog: Uncinocarpus reesii : C4JGA4]</i>                                                          |
| PDIG_62500 | PDIP_71880 | <i>Putative uncharacterized protein [Ortholog: Emericella nidulans : Q5B4L5]</i>                                   |
| PDIG_62520 | PDIP_71900 | <i>Similar to Pc18g04210 protein [Blast hit trembl: Penicillium chrysogenum : B6HBI5]</i>                          |
| PDIG_62750 | PDIP_72130 | <i>Putative uncharacterized protein [Ortholog: Emericella nidulans : Q5B4M6]</i>                                   |
| PDIG_62940 | PDIP_72320 | <i>Putative uncharacterized protein [Ortholog: Emericella nidulans : Q5BCB3]</i>                                   |
| PDIG_63030 | PDIP_72410 | <i>Putative uncharacterized protein [Ortholog: Aspergillus fumigatus : A4D9L5]</i>                                 |
| PDIG_63100 | PDIP_72480 | <i>Cytochrome c peroxidase Ccp1, putative [Ortholog: Aspergillus clavatus : A1CHM3]</i>                            |
| PDIG_63370 | -          | <i>GPI anchored cell wall protein, putative [Ortholog: Talaromyces stipitatus : B8M636]</i>                        |
| PDIG_63610 | PDIP_72960 | <i>Similar to Pc18g02930 protein [Blast hit trembl: Penicillium chrysogenum : B6HB62]</i>                          |
| PDIG_63640 | PDIP_72990 | <i>Lysophospholipase 1 [Ortholog: Aspergillus fumigatus : P0C957]</i>                                              |
| PDIG_63800 | PDIP_73150 | <i>Similar to Pc18g02680 protein [Blast hit trembl: Penicillium chrysogenum : B6HCY9]</i>                          |
| PDIG_63850 | PDIP_73200 | <i>Exo-beta-1,3-glucanase (Exg1), putative [Ortholog: Talaromyces stipitatus : B8MFD7]</i>                         |
| PDIG_63880 | PDIP_73230 | <i>Putative uncharacterized protein [Ortholog: Magnaporthe grisea : A4REV5]</i>                                    |
| PDIG_63950 | PDIP_73300 | <i>Putative uncharacterized protein [Ortholog: Neurospora crassa : Q7RZS2]</i>                                     |
| PDIG_64230 | PDIP_73570 | <i>Similar to putative uncharacterized protein Pc18g01790 [Blast hit trembl: Penicillium chrysogenum : B6HCK0]</i> |
| PDIG_64290 | PDIP_73630 | <i>Exo-arabinanase [Ortholog: Penicillium chrysogenum : Q7ZA77]</i>                                                |
| PDIG_64510 | PDIP_73850 | <i>Capsule-associated protein CAP1, putative [Ortholog: Aspergillus fumigatus : A4D9T1]</i>                        |

|            |            |                                                                                                                    |
|------------|------------|--------------------------------------------------------------------------------------------------------------------|
| PDIG_64640 | PDIP_73980 | <i>Flavin containing polyamine oxidase, putative [Ortholog: Aspergillus fumigatus : Q4WUU7]</i>                    |
| PDIG_64930 | PDIP_74260 | <i>Similar to Pc18g01380 protein [Blast hit trembl: Penicillium chrysogenum : B6HCA9]</i>                          |
| PDIG_65090 | PDIP_74420 | <i>Signal peptidase I [Ortholog: Aspergillus fumigatus : Q4WYF4]</i>                                               |
| PDIG_65350 | PDIP_74680 | <i>Glutaminase, putative [Ortholog: Aspergillus fumigatus : Q4WXW3]</i>                                            |
| PDIG_66010 | PDIP_75310 | <i>Oxidoreductase, putative [Ortholog: Talaromyces stipitatus : B8M818]</i>                                        |
| PDIG_66050 | PDIP_75350 | Putative protein                                                                                                   |
| PDIG_66660 | PDIP_75960 | <i>Prenylcysteine lyase, putative [Ortholog: Aspergillus fumigatus : Q4WXF5]</i>                                   |
| PDIG_66890 | PDIP_76190 | <i>Extracellular thaumatin domain protein, putative [Ortholog: Aspergillus fumigatus : Q4WXJ1]</i>                 |
| PDIG_67040 | PDIP_76340 | <i>Putative uncharacterized protein [Ortholog: Talaromyces stipitatus : B8LUR9]</i>                                |
| PDIG_67220 | PDIP_76520 | <i>Putative uncharacterized protein [Ortholog: Talaromyces stipitatus : B8LUQ8]</i>                                |
| PDIG_67240 | PDIP_76540 | <i>Putative uncharacterized protein [Ortholog: Aspergillus fumigatus : Q4WL81]</i>                                 |
| PDIG_67620 | PDIP_76920 | <i>Putative uncharacterized protein [Ortholog: Aspergillus clavatus : A1CP92]</i>                                  |
| PDIG_67660 | PDIP_76960 | <i>Phosphate-repressible acid phosphatase [Ortholog: Penicillium chrysogenum : P37274]</i>                         |
| PDIG_67710 | PDIP_77010 | Putative protein                                                                                                   |
| PDIG_67760 | PDIP_77070 | <i>Putative uncharacterized protein [Ortholog: Emericella nidulans : Q5AX32]</i>                                   |
| PDIG_67780 | PDIP_77090 | <i>Tripeptidyl-peptidase sed2 [Ortholog: Aspergillus fumigatus : Q70J59]</i>                                       |
| PDIG_67820 | PDIP_77130 | <i>Predicted protein [Ortholog: Emericella nidulans : Q5BCB7]</i>                                                  |
| PDIG_67880 | PDIP_77180 | <i>Similar to putative uncharacterized protein Pc12g14560 [Blast hit trembl: Penicillium chrysogenum : B6H127]</i> |
| PDIG_67970 | PDIP_77270 | <i>Putative uncharacterized protein [Ortholog: Emericella nidulans : Q5BCK7]</i>                                   |
| PDIG_68100 | PDIP_77390 | <i>Putative uncharacterized protein [Ortholog: Emericella nidulans : Q5BAF7]</i>                                   |
| PDIG_68540 | PDIP_77830 | <i>NPP1 domain protein, putative [Ortholog: Aspergillus fumigatus : Q4WDT6]</i>                                    |
| PDIG_68640 | PDIP_77930 | <i>Putative uncharacterized protein [Ortholog: Aspergillus fumigatus : Q4W9C5]</i>                                 |
| PDIG_68790 | PDIP_78070 | <i>GPI anchored protein, putative [Ortholog: Aspergillus fumigatus : Q4WA89]</i>                                   |
| PDIG_68840 | PDIP_78120 | <i>Antifungal protein Afp [Ortholog: Aspergillus clavatus : A1CSS4]</i>                                            |
| PDIG_68890 | PDIP_78170 | <i>Related to mixed-linked glucanase MLG1 [Ortholog: Neurospora crassa : Q9P6T0]</i>                               |
| PDIG_69010 | PDIP_78300 | <i>6-hydroxy-D-nicotine oxidase [Ortholog: Pyrenophora tritici-repentis : B2VT97]</i>                              |
| PDIG_69070 | PDIP_78360 | <i>Similar to putative uncharacterized protein Pc12g12930 [Blast hit trembl: Penicillium chrysogenum : B6GZA9]</i> |
| PDIG_69610 | PDIP_78900 | <i>Malate dehydrogenase [Ortholog: Aspergillus fumigatus : Q4X0E0]</i>                                             |
| PDIG_69650 | PDIP_78940 | <i>Predicted protein [Blast hit trembl: Ajellomyces capsulata : A6R4R3]</i>                                        |
| PDIG_70320 | PDIP_79630 | <i>RING finger domain protein, putative [Ortholog: Talaromyces stipitatus : B8MRM7]</i>                            |
| PDIG_70440 | PDIP_79750 | Putative protein                                                                                                   |
| PDIG_70560 | PDIP_79870 | <i>Putative uncharacterized protein [Ortholog: Emericella nidulans : Q5AVZ6]</i>                                   |
| PDIG_70700 | PDIP_80020 | <i>78 kDa glucose-regulated protein homolog [Ortholog: Aspergillus niger : P83616]</i>                             |
| PDIG_70730 | PDIP_80050 | <i>Similar to putative uncharacterized protein Pc12g10760 [Blast hit trembl: Penicillium chrysogenum : B6H029]</i> |
| PDIG_70770 | PDIP_80090 | Putative protein                                                                                                   |
| PDIG_70870 | PDIP_80190 | <i>Putative uncharacterized protein [Ortholog: Emericella nidulans : Q5AY57]</i>                                   |
| PDIG_71110 | PDIP_80430 | <i>Similar to putative uncharacterized protein Pc21g01840 [Blast hit trembl: Penicillium chrysogenum : B6HJ80]</i> |
| PDIG_71340 | PDIP_80640 | Putative protein                                                                                                   |
| PDIG_71440 | PDIP_80740 | <i>HET-C domain protein HetC [Ortholog: Aspergillus fumigatus : Q4WZT4]</i>                                        |
| PDIG_71660 | PDIP_80960 | Putative protein                                                                                                   |
| PDIG_71690 | PDIP_80990 | <i>Isoamyl alcohol oxidase, putative [Ortholog: Aspergillus fumigatus : Q4WAD8]</i>                                |
| PDIG_71860 | PDIP_81130 | <i>Predicted protein [Ortholog: Magnaporthe grisea : A4R1S4]</i>                                                   |
| PDIG_72240 | PDIP_81510 | <i>Endo-1,3(4)-beta-glucanase, putative [Ortholog: Aspergillus fumigatus : Q4WW10]</i>                             |
| PDIG_72260 | PDIP_81530 | <i>Oxidoreductase, short chain dehydrogenase/reductase family [Ortholog: Aspergillus fumigatus : Q4WW07]</i>       |
| PDIG_72850 | PDIP_43330 | <i>ADP-ribosylglycohydrolase family protein [Ortholog: Aspergillus fumigatus : Q4WBA1]</i>                         |
| PDIG_73060 | PDIP_43540 | <i>Similar to Pc22g04150 protein [Blast hit trembl: Penicillium chrysogenum : B6HSM9]</i>                          |
| PDIG_73180 | PDIP_43660 | <i>Class I alpha-mannosidase 1A [Ortholog: Aspergillus fumigatus : Q4WLT8]</i>                                     |
| PDIG_74350 | PDIP_44830 | <i>Phosphoesterase, putative [Ortholog: Aspergillus fumigatus : Q4WQG2]</i>                                        |
| PDIG_74370 | PDIP_44850 | Putative protein                                                                                                   |
| PDIG_74460 | PDIP_44940 | <i>Putative uncharacterized protein [Ortholog: Aspergillus fumigatus : Q4WLQ9]</i>                                 |
| PDIG_74690 | PDIP_45160 | Putative protein                                                                                                   |
| PDIG_75150 | PDIP_45620 | <i>Similar to Pc22g01400 protein [Blast hit trembl: Penicillium chrysogenum : B6HP38]</i>                          |

|            |            |                                                                                                                      |
|------------|------------|----------------------------------------------------------------------------------------------------------------------|
| PDIG_75420 | PDIP_45890 | <i>Chitinase, putative [Ortholog: Talaromyces stipitatus : B8M4H6]</i>                                               |
| PDIG_75600 | PDIP_50170 | <i>Carboxypeptidase Y homolog A [Ortholog: Aspergillus fumigatus : Q5VJG9]</i>                                       |
| PDIG_75780 | PDIP_46250 | Putative protein                                                                                                     |
| PDIG_75860 | PDIP_46330 | Putative protein                                                                                                     |
| PDIG_75930 | PDIP_46400 | Putative protein                                                                                                     |
| PDIG_76210 | PDIP_46680 | <i>Cell wall protein PhiA [Ortholog: Aspergillus fumigatus : Q4WF87]</i>                                             |
| PDIG_76410 | PDIP_29840 | <i>Similar to Pc13g09460 protein [Blast hit trembl: Penicillium chrysogenum : B6H428]</i>                            |
| PDIG_76430 | PDIP_29860 | <i>Putative uncharacterized protein [Blast hit trembl: Aspergillus terreus: Q0CGT3]</i>                              |
| PDIG_76480 | PDIP_05060 | <i>1,4-beta-D-glucan-cellobiohydrolase, putative [Ortholog: Talaromyces stipitatus : B8MK69]</i>                     |
| PDIG_76490 | PDIP_05050 | Putative protein                                                                                                     |
| PDIG_76620 | PDIP_42760 | <i>Putative uncharacterized protein [Ortholog: Aspergillus fumigatus : Q4WBE2]</i>                                   |
| PDIG_76850 | PDIP_03970 | <i>Oxidoreductin [Ortholog: Aspergillus fumigatus : Q4WCA3]</i>                                                      |
| PDIG_76970 | PDIP_04090 | <i>Endo-arabinase, putative [Ortholog: Aspergillus fumigatus : Q4X046]</i>                                           |
| PDIG_77000 | PDIP_04120 | <i>Similar to Pc12g01280 protein [Blast hit trembl: Penicillium chrysogenum : B6GYR7]</i>                            |
| PDIG_77100 | PDIP_04220 | Putative protein                                                                                                     |
| PDIG_77160 | PDIP_04280 | <i>Putative uncharacterized protein [Ortholog: Emericella nidulans : Q5AXN2]</i>                                     |
| PDIG_77170 | PDIP_04290 | <i>Probable glycosidase crf1 [Ortholog: Aspergillus fumigatus : Q8J0P4]</i>                                          |
| PDIG_77280 | PDIP_04400 | <i>Putative uncharacterized protein [Ortholog: Magnaporthe grisea : A4RGC9]</i>                                      |
| PDIG_77300 | PDIP_04420 | Putative protein                                                                                                     |
| PDIG_77360 | PDIP_04480 | Putative protein                                                                                                     |
| PDIG_77440 | PDIP_04550 | <i>Putative uncharacterized protein [Ortholog: Aspergillus niger : Q3MSB5]</i>                                       |
| PDIG_77510 | PDIP_04620 | <i>Citrate synthase [Ortholog: Aspergillus fumigatus : A4D9B8]</i>                                                   |
| PDIG_77520 | PDIP_04630 | <i>Similar to Pc12g00660 protein [Blast hit trembl: Penicillium chrysogenum : B6GXU9]</i>                            |
| PDIG_77680 | PDIP_04790 | <i>Aldose 1-epimerase, putative [Ortholog: Talaromyces stipitatus : B8M6K3]</i>                                      |
| PDIG_78300 | PDIP_26720 | <i>Similar to putative uncharacterized protein Pc13g12600 [Blast hit trembl: Penicillium chrysogenum : B6H354]</i>   |
| PDIG_78510 | PDIP_26930 | <i>Putative uncharacterized protein [Ortholog: Aspergillus fumigatus : Q4WSI4]</i>                                   |
| PDIG_78620 | PDIP_27030 | <i>Endoglucanase, putative [Ortholog: Aspergillus fumigatus : Q6MYM8]</i>                                            |
| PDIG_78880 | PDIP_27290 | <i>Protein PRY2 [Blast hit: Saccharomyces cerevisiae: P36110]</i>                                                    |
| PDIG_79130 | PDIP_27540 | Putative protein                                                                                                     |
| PDIG_79140 | PDIP_27550 | <i>Putative uncharacterized protein [Ortholog: Talaromyces stipitatus : B8M267]</i>                                  |
| PDIG_79360 | PDIP_27750 | <i>Alfa-L-arabinofuranosidase [Ortholog: Penicillium chrysogenum : B5MGR1]</i>                                       |
| PDIG_79990 | PDIP_28370 | <i>Similar to putative uncharacterized protein Pc13g11090 [Blast hit trembl: Penicillium chrysogenum : B6H3X5]</i>   |
| PDIG_80010 | PDIP_28390 | <i>Putative uncharacterized protein [Ortholog: Aspergillus fumigatus : Q6MYV7]</i>                                   |
| PDIG_80170 | PDIP_28560 | <i>Predicted protein [Ortholog: Emericella nidulans : Q5AYF8]</i>                                                    |
| PDIG_80350 | PDIP_28740 | <i>Fructosyl amino acid oxidasesarcosine oxidase, putative [Ortholog: Aspergillus fumigatus : Q4WXN4]</i>            |
| PDIG_80410 | PDIP_28800 | <i>Similar to Pc13g10570 protein [Blast hit trembl: Penicillium chrysogenum : B6H3Y9]</i>                            |
| PDIG_80520 | PDIP_28910 | <i>Meiotic sister chromatid recombination protein Ish1/Msc1, putative [Ortholog: Aspergillus fumigatus : Q4WXS0]</i> |
| PDIG_80660 | PDIP_29050 | <i>Similar to putative uncharacterized protein Pc13g10230 [Blast hit trembl: Penicillium chrysogenum : B6H4S3]</i>   |
| PDIG_81260 | PDIP_29610 | <i>Vacuolar protease A [Ortholog: Aspergillus fumigatus : O42630]</i>                                                |
| PDIG_81290 | -          | Putative protein                                                                                                     |
| PDIG_81380 | PDIP_29720 | <i>Hypothetical protein [Blast hit trembl: Penicillium chrysogenum : B6H439]</i>                                     |
| PDIG_81760 | PDIP_30120 | Putative protein                                                                                                     |
| PDIG_82430 | PDIP_88730 | <i>MOSC domain protein [Ortholog: Aspergillus fumigatus : A4D9P8]</i>                                                |
| PDIG_82590 | PDIP_86390 | <i>Putative uncharacterized protein [Ortholog: Talaromyces stipitatus : B8LYY3]</i>                                  |
| PDIG_82710 | PDIP_86500 | <i>1,3-beta-glucanosyltransferase gel4 [Ortholog: Aspergillus fumigatus : P0C956]</i>                                |
| PDIG_82970 | PDIP_86760 | <i>Putative uncharacterized protein [Ortholog: Emericella nidulans : Q5AW42]</i>                                     |
| PDIG_83060 | PDIP_86850 | <i>Putative uncharacterized protein [Ortholog: Emericella nidulans : Q5B856]</i>                                     |
| PDIG_83210 | PDIP_87000 | <i>Similar to putative uncharacterized protein Pc22g08820 [Blast hit trembl: Penicillium chrysogenum : B6HT41]</i>   |
| PDIG_83500 | PDIP_89000 | <i>Allergen Asp f 15 [Ortholog: Aspergillus fumigatus : O60022]</i>                                                  |
| PDIG_83870 | PDIP_89360 | <i>Mitochondrial large ribosomal subunit protein L16, putative [Ortholog: Aspergillus fumigatus : Q4X0U8]</i>        |
| PDIG_84720 | PDIP_22380 | <i>Similar to Pc13g05210 protein [Blast hit trembl: Penicillium chrysogenum : B6H2F9]</i>                            |
| PDIG_84890 | PDIP_22550 | Putative protein                                                                                                     |

|            |            |                                                                                                                    |
|------------|------------|--------------------------------------------------------------------------------------------------------------------|
| PDIG_85230 | PDIP_22880 | <i>Putative uncharacterized protein [Ortholog: Talaromyces stipitatus : B8M3V7]</i>                                |
| PDIG_85650 | PDIP_47400 | <i>Similar to putative uncharacterized protein Pc20g01700 [Blast hit trembl: Penicillium chrysogenum : B6HDQ5]</i> |
| PDIG_85670 | PDIP_47380 | <i>Putative uncharacterized protein [Ortholog: Aspergillus fumigatus : Q4WMK6]</i>                                 |
| PDIG_85800 | PDIP_47270 | <i>Esterase, putative [Ortholog: Aspergillus fumigatus : Q4WZE4]</i>                                               |
| PDIG_85970 | PDIP_47100 | <i>Tripeptidyl-peptidase sed1 [Ortholog: Aspergillus fumigatus : Q70DX9]</i>                                       |
| PDIG_86170 | PDIP_32190 | Putative protein                                                                                                   |
| PDIG_86180 | PDIP_32200 | <i>Predicted protein [Ortholog: Emericella nidulans : Q5B234]</i>                                                  |
| PDIG_86320 | PDIP_32340 | <i>Carboxylesterase family protein [Ortholog: Aspergillus clavatus : A1CFK9]</i>                                   |
| PDIG_86820 | PDIP_32810 | <i>LPS glycosyltransferase, putative [Ortholog: Aspergillus fumigatus : Q4WB10]</i>                                |
| PDIG_86860 | PDIP_32850 | <i>Predicted protein [Ortholog: Uncinocarpus reesii : C4JFX5]</i>                                                  |
| PDIG_86870 | PDIP_32860 | <i>Function: S. cerevisiae frataxin [Ortholog: Aspergillus niger : A2QJ83]</i>                                     |
| PDIG_86920 | PDIP_32910 | <i>Putative uncharacterized protein [Ortholog: Aspergillus niger : A2QJ78]</i>                                     |
| PDIG_87060 | PDIP_33060 | <i>50S ribosomal protein L24 [Ortholog: Talaromyces stipitatus : B8LWP4]</i>                                       |
| PDIG_87110 | PDIP_33120 | <i>Function: gma12p is not the only galactosyltransferase in S. pombe [Ortholog: Aspergillus niger : A2QJ61]</i>   |
| PDIG_87320 | -          | Putative protein                                                                                                   |
| PDIG_87520 | PDIP_33550 | <i>Putative uncharacterized protein [Ortholog: Emericella nidulans : Q5AWB9]</i>                                   |
| PDIG_87530 | PDIP_33560 | <i>Putative uncharacterized protein [Ortholog: Emericella nidulans : Q5AWB8]</i>                                   |
| PDIG_87550 | PDIP_33580 | <i>Putative uncharacterized protein [Ortholog: Emericella nidulans : Q5BAD7]</i>                                   |
| PDIG_87690 | PDIP_33710 | <i>Putative uncharacterized protein [Ortholog: Aspergillus fumigatus : Q4WQ16]</i>                                 |
| PDIG_88040 | PDIP_34060 | <i>Pectate lyase [Ortholog: Emericella nidulans : Q5ATC7]</i>                                                      |
| PDIG_88470 | PDIP_31750 | <i>GPI anchor transamidase, putative [Ortholog: Aspergillus fumigatus : Q4WRT8]</i>                                |
| PDIG_88690 | PDIP_32000 | <i>Putative uncharacterized protein [Ortholog: Aspergillus fumigatus : Q4X0X1]</i>                                 |
| PDIG_88850 | -          | <i>Putative uncharacterized protein [Blast hit trembl: Aspergillus clavatus : A1CCV8]</i>                          |
| PDIG_88980 | PDIP_03250 | <i>Putative uncharacterized protein [Ortholog: Magnaporthe grisea : A4R9J2]</i>                                    |
| PDIG_89180 | PDIP_03450 | <i>Putative uncharacterized protein [Ortholog: Talaromyces stipitatus : B8MR87]</i>                                |
| PDIG_89390 | PDIP_03660 | <i>Probable beta-glucosidase btgE [Ortholog: Emericella nidulans : Q5BD29]</i>                                     |
| PDIG_89450 | PDIP_03720 | <i>Similar to Pc12g03260 protein [Blast hit trembl: Penicillium chrysogenum : B6H0V5]</i>                          |
| PDIG_89690 | -          | <i>Cell wall protein, putative [Ortholog: Aspergillus clavatus : A1CJT0]</i>                                       |
| PDIG_89980 | PDIP_06900 | <i>Endo alpha-1,4 polygalactosaminidase precursor [Ortholog: Pyrenophora tritici-repentis : B2WPP4]</i>            |
| PDIG_90290 | PDIP_07220 | <i>Putative uncharacterized protein [Ortholog: Aspergillus fumigatus : Q4WIJ7]</i>                                 |
| PDIG_90450 | PDIP_07370 | <i>Putative uncharacterized protein [Ortholog: Emericella nidulans : Q5AVK8]</i>                                   |
| PDIG_90800 | PDIP_07720 | <i>Cellobiose dehydrogenase [Ortholog: Coccidioides posadasii/Verticillium albo-atrum : C9SCR2]</i>                |
| PDIG_91100 | PDIP_08020 | <i>L-asparaginase [Ortholog: Aspergillus fumigatus : Q4WKE2]</i>                                                   |
| PDIG_91190 | -          | Minor spike protein H [Blast hit: Enterobacteria phage phiX174: P03646]                                            |
| PDIG_91370 | PDIP_88420 | <i>Putative uncharacterized protein [Ortholog: Aspergillus fumigatus : Q4WW49]</i>                                 |
| -          | PDIP_25870 | Putative protein                                                                                                   |
| -          | PDIP_17540 | Putative protein                                                                                                   |
| -          | PDIP_35490 | Putative protein                                                                                                   |
| -          | PDIP_41810 | Putative protein                                                                                                   |
| -          | PDIP_57270 | Putative protein                                                                                                   |
| -          | PDIP_57730 | Putative protein                                                                                                   |
| -          | PDIP_60540 | Putative protein                                                                                                   |
| -          | PDIP_06040 | Putative protein                                                                                                   |
| -          | PDIP_04990 | Putative protein                                                                                                   |
| -          | PDIP_85780 | Putative protein                                                                                                   |
| -          | PDIP_33340 | Putative protein                                                                                                   |
